# Supplementary material for: Unveiling the Probiotic Potential of the Anaerobic Bacterium Cetobacterium sp. nov. C33 for Enhancing Nile Tilapia (Oreochromis niloticus) Cultures
Source: MDPI journal article supplement (doi:10.3390/microorganisms11122922), 2023-12-05
Supplement: s1 [file s1]

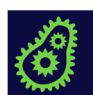

**Table S1.** Whole genome annotation of bacteria strain C33 with features of interest.

| c                                                | Subcategory                                                                           | Subsystem                                              | Role                                                                                                   |                                                         |
|--------------------------------------------------|---------------------------------------------------------------------------------------|--------------------------------------------------------|--------------------------------------------------------------------------------------------------------|---------------------------------------------------------|
| Cofactors, Vitamins, Prosthetic Groups, Pigments | Biotin                                                                                | Biotin biosynthesis                                    | Dethiobiotin synthetase (EC 6.3.3.3)                                                                   |                                                         |
|                                                  |                                                                                       |                                                        | Biotin synthase (EC 2.8.1.6)                                                                           |                                                         |
|                                                  |                                                                                       |                                                        | Biotin operon repressor                                                                                |                                                         |
|                                                  |                                                                                       |                                                        | Adenosylmethionine-8-amino-7-oxononanoate aminotransferase (EC 2.6.1.62)                               |                                                         |
|                                                  |                                                                                       |                                                        | 8-amino-7-oxononanoate synthase (EC 2.3.1.47)                                                          |                                                         |
|                                                  |                                                                                       | Biotin biosynthesis Experimental                       | Dethiobiotin synthetase (EC 6.3.3.3)                                                                   |                                                         |
|                                                  |                                                                                       |                                                        | Biotin synthase (EC 2.8.1.6)                                                                           |                                                         |
|                                                  |                                                                                       |                                                        | Adenosylmethionine-8-amino-7-oxononanoate aminotransferase (EC 2.6.1.62)                               |                                                         |
|                                                  |                                                                                       |                                                        | 8-amino-7-oxononanoate synthase (EC 2.3.1.47)                                                          |                                                         |
|                                                  |                                                                                       |                                                        | Hydroxymethylpyrimidine ABC transporter, substrate-binding component                                   |                                                         |
|                                                  | Cofactors, Vitamins, Prosthetic Groups, Pigments - no subcategory                     | Thiamin biosynthesis                                   | Thiamin pyrophosphokinase (EC 2.7.6.2)                                                                 |                                                         |
|                                                  |                                                                                       |                                                        | Thiamine-monophosphate kinase (EC 2.7.4.16)                                                            |                                                         |
|                                                  |                                                                                       |                                                        | 1-deoxy-D-xylulose 5-phosphate synthase (EC 2.2.1.7)                                                   |                                                         |
|                                                  |                                                                                       |                                                        | Thiamin ABC transporter, substrate-binding component                                                   |                                                         |
|                                                  |                                                                                       |                                                        | Hydroxymethylpyrimidine ABC transporter, transmembrane component                                       |                                                         |
|                                                  |                                                                                       |                                                        | Thiamin-phosphate pyrophosphorylase (EC 2.5.1.3)                                                       |                                                         |
|                                                  |                                                                                       | Tetrapyrroles                                          | Cobalamin synthesis                                                                                    | Hydroxyethylthiazole kinase (EC 2.7.1.50)               |
|                                                  |                                                                                       |                                                        |                                                                                                        | L-threonine 3-O-phosphate decarboxylase (EC 4.1.1.81)   |
|                                                  |                                                                                       |                                                        |                                                                                                        | Cobalt-precorrin-8x methylmutase (EC 5.4.1.2)           |
|                                                  |                                                                                       |                                                        |                                                                                                        | Cobalt-precorrin-2 C20-methyltransferase (EC 2.1.1.130) |
|                                                  | Cobyric acid synthase (EC 6.3.5.10)                                                   |                                                        |                                                                                                        |                                                         |
|                                                  | Cobalamin biosynthesis protein CbiG                                                   |                                                        |                                                                                                        |                                                         |
|                                                  | Sirohydrochlorin cobaltochelataase CbiK (EC 4.99.1.3)                                 |                                                        |                                                                                                        |                                                         |
|                                                  | Adenosylcobinamide kinase (EC 2.7.1.156)                                              |                                                        |                                                                                                        |                                                         |
|                                                  | Cobalt-precorrin-6x reductase (EC 1.3.1.54)                                           |                                                        |                                                                                                        |                                                         |
|                                                  | Adenosylcobinamide-phosphate guanylyltransferase (EC 2.7.7.62)                        |                                                        |                                                                                                        |                                                         |
|                                                  | Cobalt-precorrin-3b C17-methyltransferase                                             |                                                        |                                                                                                        |                                                         |
|                                                  | Cobalt-precorrin-4 C11-methyltransferase (EC 2.1.1.133)                               |                                                        |                                                                                                        |                                                         |
|                                                  | Adenosylcobinamide-phosphate synthase (EC 6.3.1.10)                                   |                                                        |                                                                                                        |                                                         |
|                                                  | Nicotinate-nucleotide--dimethylbenzimidazole phosphoribosyl-transferase (EC 2.4.2.21) |                                                        |                                                                                                        |                                                         |
|                                                  | Alpha-ribazole-5'-phosphate phosphatase (EC 3.1.3.73)                                 |                                                        |                                                                                                        |                                                         |
|                                                  | Heme and Siroheme Biosynthesis                                                        |                                                        | Cobalt-precorrin-6 synthase, anaerobic                                                                 |                                                         |
|                                                  |                                                                                       |                                                        | Cobalamin synthase (EC 2.7.8.26)                                                                       |                                                         |
|                                                  |                                                                                       |                                                        | Cobyric acid A,C-diamide synthase                                                                      |                                                         |
|                                                  |                                                                                       |                                                        | Hypothetical radical SAM family enzyme, NOT coproporphyrinogen III oxidase, oxygen-independent         |                                                         |
|                                                  |                                                                                       |                                                        | Hypothetical radical SAM family enzyme in heat shock gene cluster, similarity with CPO of BS HemN-type |                                                         |
| Glutamyl-tRNA synthetase (EC 6.1.1.17)           |                                                                                       |                                                        |                                                                                                        |                                                         |
| Riboflavin, FMN, FAD                             |                                                                                       | Uroporphyrinogen-III synthase (EC 4.2.1.75)            |                                                                                                        |                                                         |
|                                                  |                                                                                       | Glutamate-1-semialdehyde aminotransferase (EC 5.4.3.8) |                                                                                                        |                                                         |
|                                                  |                                                                                       | Precorrin-2 oxidase (EC 1.3.1.76)                      |                                                                                                        |                                                         |
|                                                  |                                                                                       | Porphobilinogen synthase (EC 4.2.1.24)                 |                                                                                                        |                                                         |
|                                                  |                                                                                       | Glutamyl-tRNA reductase (EC 1.2.1.70)                  |                                                                                                        |                                                         |
|                                                  |                                                                                       | Porphobilinogen deaminase (EC 2.5.1.61)                |                                                                                                        |                                                         |
|                                                  |                                                                                       | Uroporphyrinogen-III methyltransferase (EC 2.1.1.107)  |                                                                                                        |                                                         |
|                                                  |                                                                                       | Sirohydrochlorin ferrochelataase (EC 4.99.1.4)         |                                                                                                        |                                                         |
|                                                  |                                                                                       | FMN adenylyltransferase (EC 2.7.7.2)                   |                                                                                                        |                                                         |
|                                                  |                                                                                       | FIG000859: hypothetical protein YebC                   |                                                                                                        |                                                         |

|                                              |                                           |                                                                                                            |
|----------------------------------------------|-------------------------------------------|------------------------------------------------------------------------------------------------------------|
| Riboflavin, FMN and FAD metabolism in plants |                                           | Molybdopterin binding motif, CinA N-terminal domain                                                        |
|                                              |                                           | Multi antimicrobial extrusion protein (Na <sup>+</sup> )/drug antiporter), MATE family of MDR efflux pumps |
|                                              |                                           | C-terminal domain of CinA type S                                                                           |
|                                              |                                           | 6,7-dimethyl-8-ribityllumazine synthase (EC 2.5.1.78)                                                      |
|                                              |                                           | Adenosine deaminase (EC 3.5.4.4), alternative form                                                         |
|                                              |                                           | 5-amino-6-(5-phosphoribosylamino)uracil reductase (EC 1.1.1.193)                                           |
|                                              |                                           | tRNA pseudouridine synthase B (EC 4.2.1.70)                                                                |
|                                              |                                           | Riboflavin kinase (EC 2.7.1.26)                                                                            |
|                                              |                                           | GTP cyclohydrolase II (EC 3.5.4.25)                                                                        |
|                                              |                                           | tRNA (5-methylaminomethyl-2-thiouridylate)-methyltransferase (EC 2.1.1.61)                                 |
|                                              |                                           | Riboflavin synthase eubacterial/eukaryotic (EC 2.5.1.9)                                                    |
|                                              |                                           | Diaminohydroxyphosphoribosylaminopyrimidine deaminase (EC 3.5.4.26)                                        |
|                                              |                                           | 3,4-dihydroxy-2-butanone 4-phosphate synthase (EC 4.1.99.12)                                               |
|                                              |                                           | FMN adenylyltransferase (EC 2.7.7.2)                                                                       |
| riboflavin to FAD                            |                                           | Riboflavin synthase eubacterial/eukaryotic (EC 2.5.1.9)                                                    |
|                                              |                                           | Riboflavin kinase (EC 2.7.1.26)                                                                            |
|                                              |                                           | 3,4-dihydroxy-2-butanone 4-phosphate synthase (EC 4.1.99.12)                                               |
|                                              |                                           | Flavodoxin                                                                                                 |
| Flavodoxin                                   |                                           | NAD(P)H oxidoreductase YRKL (EC 1.6.99.-)                                                                  |
|                                              |                                           | Flavodoxin 1                                                                                               |
|                                              |                                           | Flavodoxin 2                                                                                               |
| Riboflavin, FMN and FAD metabolism           |                                           | FMN adenylyltransferase (EC 2.7.7.2)                                                                       |
|                                              |                                           | 6,7-dimethyl-8-ribityllumazine synthase (EC 2.5.1.78)                                                      |
|                                              |                                           | Adenosine deaminase (EC 3.5.4.4), alternative form                                                         |
|                                              |                                           | 5-amino-6-(5-phosphoribosylamino)uracil reductase (EC 1.1.1.193)                                           |
|                                              |                                           | Riboflavin kinase (EC 2.7.1.26)                                                                            |
|                                              |                                           | GTP cyclohydrolase II (EC 3.5.4.25)                                                                        |
|                                              |                                           | Riboflavin synthase eubacterial/eukaryotic (EC 2.5.1.9)                                                    |
|                                              |                                           | Diaminohydroxyphosphoribosylaminopyrimidine deaminase (EC 3.5.4.26)                                        |
|                                              |                                           | 3,4-dihydroxy-2-butanone 4-phosphate synthase (EC 4.1.99.12)                                               |
|                                              |                                           | Nicotinate phosphoribosyltransferase (EC 2.4.2.11)                                                         |
| NAD and NADP                                 | NAD and NADP cofactor biosynthesis global | NAD kinase (EC 2.7.1.23)                                                                                   |
|                                              |                                           | Glutamine amidotransferase chain of NAD synthetase                                                         |
|                                              |                                           | C-terminal domain of CinA type S                                                                           |
|                                              |                                           | Nicotinate-nucleotide adenylyltransferase (EC 2.7.7.18)                                                    |
|                                              |                                           | Nicotinamidase (EC 3.5.1.19)                                                                               |
| Folate and pterines                          | Folate biosynthesis cluster               | NAD synthetase (EC 6.3.1.5)                                                                                |
|                                              |                                           | GTP cyclohydrolase I (EC 3.5.4.16) type 1                                                                  |
|                                              |                                           | Cell division protein FtsH (EC 3.4.24.-)                                                                   |
|                                              |                                           | Dihydropteroate synthase (EC 2.5.1.15)                                                                     |
|                                              |                                           | Dihydropteridine aldolase (EC 4.1.2.25)                                                                    |
|                                              |                                           | 2-amino-4-hydroxy-6-hydroxymethylidihydropteridine pyrophosphokinase (EC 2.7.6.3)                          |
|                                              |                                           | tRNA(Ile)-lysine synthetase (EC 6.3.4.19)                                                                  |
|                                              |                                           | Hypoxanthine-guanine phosphoribosyltransferase (EC 2.4.2.8)                                                |
| Coenzyme A                                   | Coenzyme A Biosynthesis                   | Pantothenate:Na <sup>+</sup> symporter (TC 2.A.21.1.1)                                                     |
|                                              |                                           | Phosphopantetheine adenylyltransferase (EC 2.7.7.3)                                                        |
|                                              |                                           | Ketol-acid reductoisomerase (EC 1.1.1.86)                                                                  |
|                                              |                                           | Phosphopantothenoylcysteine synthetase (EC 6.3.2.5)                                                        |
|                                              |                                           | Phosphopantothenoylcysteine decarboxylase (EC 4.1.1.36)                                                    |
|                                              |                                           | Dephospho-CoA kinase (EC 2.7.1.24)                                                                         |
|                                              |                                           | Pantothenate kinase type III, CoaX-like (EC 2.7.1.33)                                                      |

|                                    |                                             |                               |                                                                                                  |
|------------------------------------|---------------------------------------------|-------------------------------|--------------------------------------------------------------------------------------------------|
| Cell Wall and Capsule              | Capsular and extra-cellular polysaccharides | dTDP-rhamnose synthesis       | dTDP-4-dehydrorhamnose reductase (EC 1.1.1.133)                                                  |
|                                    |                                             |                               | Glucose-1-phosphate cytidyltransferase (EC 2.7.7.33)                                             |
|                                    |                                             |                               | dTDP-glucose 4,6-dehydratase (EC 4.2.1.46)                                                       |
|                                    |                                             |                               | dTDP-rhamnosyl transferase RfbF (EC 2.-.-.-)                                                     |
|                                    |                                             |                               | dTDP-4-dehydrorhamnose 3,5-epimerase (EC 5.1.3.13)                                               |
|                                    |                                             | Capsular heptose biosynthesis | Glucose-1-phosphate thymidyltransferase (EC 2.7.7.24)                                            |
|                                    |                                             |                               | Phosphoheptose isomerase (EC 5.3.1.-)                                                            |
|                                    |                                             |                               | GDP-mannose 4,6-dehydratase (EC 4.2.1.47)                                                        |
|                                    |                                             |                               | GDP-L-fucose synthetase (EC 1.1.1.271)                                                           |
|                                    |                                             |                               | dTDP-4-dehydrorhamnose 3,5-epimerase (EC 5.1.3.13)                                               |
|                                    |                                             | Polysaccharide deacetylases   | D-glycero-D-manno-heptose 1,7-bisphosphate phosphatase (EC 3.1.1.-)                              |
|                                    |                                             |                               | Peptidoglycan N-acetylglucosamine deacetylase (EC 3.5.1.-)                                       |
|                                    |                                             | Rhamnose containing glycans   | Polysaccharide deacetylase                                                                       |
|                                    |                                             |                               | UDP-glucose 4-epimerase (EC 5.1.3.2)                                                             |
|                                    |                                             |                               | dTDP-4-dehydrorhamnose reductase (EC 1.1.1.133)                                                  |
|                                    |                                             |                               | capsular polysaccharide biosynthesis protein                                                     |
|                                    |                                             |                               | dTDP-glucose 4,6-dehydratase (EC 4.2.1.46)                                                       |
|                                    | Sialic Acid Metabolism                      |                               | dTDP-4-dehydrorhamnose 3,5-epimerase (EC 5.1.3.13)                                               |
|                                    |                                             |                               | Glucose-1-phosphate thymidyltransferase (EC 2.7.7.24)                                            |
|                                    |                                             |                               | N-acetylneuraminate lyase (EC 4.1.3.3)                                                           |
|                                    |                                             |                               | Glucosamine-1-phosphate N-acetyltransferase (EC 2.3.1.157)                                       |
|                                    |                                             |                               | Predicted sialic acid transporter                                                                |
|                                    |                                             |                               | TRAP-type transport system, large permease component, predicted N-acetylneuraminate transporter  |
|                                    |                                             |                               | TRAP-type transport system, small permease component, predicted N-acetylneuraminate transporter  |
|                                    |                                             |                               | N-acetylglucosamine-6-phosphate deacetylase (EC 3.5.1.25)                                        |
|                                    |                                             |                               | Glucosamine--fructose-6-phosphate aminotransferase [isomerizing] (EC 2.6.1.16)                   |
|                                    |                                             |                               | Glucosamine-6-phosphate deaminase (EC 3.5.99.6)                                                  |
|                                    |                                             |                               | Sialic acid-induced transmembrane protein YjhT(NanM), possible mutarotase                        |
|                                    |                                             |                               | PTS system, N-acetylglucosamine-specific IIB component (EC 2.7.1.69)                             |
|                                    |                                             |                               | PTS system, N-acetylmuramic acid-specific IIB component (EC 2.7.1.69)                            |
|                                    |                                             |                               | N-acetylmannosamine-6-phosphate 2-epimerase (EC 5.1.3.9)                                         |
|                                    |                                             |                               | N-acetylmannosamine kinase (EC 2.7.1.60)                                                         |
|                                    |                                             |                               | Phosphoglucosamine mutase (EC 5.4.2.10)                                                          |
|                                    |                                             |                               | N-acetylglucosamine-1-phosphate uridyltransferase (EC 2.7.7.23)                                  |
|                                    |                                             |                               | TRAP-type transport system, periplasmic component, predicted N-acetylneuraminate-binding protein |
| Gram-Negative cell wall components | LOS core oligosaccharide biosynthesis       |                               | Sialic acid utilization regulator, RpiR family                                                   |
|                                    |                                             |                               | Putative two-domain glycosyltransferase                                                          |
|                                    |                                             |                               | Phosphoheptose isomerase (EC 5.3.1.-)                                                            |
|                                    |                                             |                               | Beta-1,3-glucosyltransferase                                                                     |
|                                    |                                             |                               | ADP-L-glycero-D-manno-heptose-6-epimerase (EC 5.1.3.20)                                          |
|                                    |                                             |                               | D-glycero-D-manno-heptose 1,7-bisphosphate phosphatase (EC 3.1.1.-)                              |
|                                    |                                             |                               | Lipopolysaccharide core biosynthesis protein RfaY                                                |
|                                    |                                             |                               | ADP-heptose synthase (EC 2.7.-.-)                                                                |
|                                    |                                             |                               | ADP-heptose--lipooligosaccharide heptosyltransferase II (EC 2.4.1.-)                             |
|                                    |                                             |                               | D-glycero-beta-D-manno-heptose 7-phosphate kinase                                                |
|                                    |                                             | Lipoprotein sorting system    | Lipoprotein releasing system transmembrane protein LolC                                          |
|                                    |                                             |                               | Lipoprotein releasing system ATP-binding protein LolD                                            |
|                                    |                                             | Murein Hydrolases             | N-acetylmuramoyl-L-alanine amidase (EC 3.5.1.28)                                                 |

|                                        |                                                             |                                                                                                                                    |
|----------------------------------------|-------------------------------------------------------------|------------------------------------------------------------------------------------------------------------------------------------|
| Cell Wall and Capsule - no subcategory | Peptidoglycan Biosynthesis                                  | D-alanyl-D-alanine carboxypeptidase (EC 3.4.16.4)                                                                                  |
|                                        |                                                             | Soluble lytic murein transglycosylase precursor (EC 3.2.1.-)                                                                       |
|                                        |                                                             | Muramoyltetrapeptide carboxypeptidase (EC 3.4.17.13)                                                                               |
|                                        |                                                             | Glucosamine-1-phosphate N-acetyltransferase (EC 2.3.1.157)                                                                         |
|                                        |                                                             | UDP-N-acetylmuramoylalanyl-D-glutamate--2,6-diaminopimelate ligase (EC 6.3.2.13)                                                   |
|                                        |                                                             | D-alanyl-D-alanine carboxypeptidase (EC 3.4.16.4)                                                                                  |
|                                        |                                                             | Cell division protein FtsI [Peptidoglycan synthetase] (EC 2.4.1.129)                                                               |
|                                        |                                                             | UDP-N-acetylenolpyruvoylglucosamine reductase (EC 1.1.1.158)                                                                       |
|                                        |                                                             | Glutamine synthetase type III, GlnN (EC 6.3.1.2)                                                                                   |
|                                        |                                                             | UDP-N-acetylglucosamine 1-carboxyvinyltransferase (EC 2.5.1.7)                                                                     |
|                                        |                                                             | UDP-N-acetylmuramoylalanine--D-glutamate ligase (EC 6.3.2.9)                                                                       |
|                                        |                                                             | UDP-N-acetylglucosamine--N-acetylmuramyl-(pentapeptide) pyrophosphoryl-undecaprenol N-acetylglucosamine transferase (EC 2.4.1.227) |
|                                        |                                                             | Rod shape-determining protein RodA                                                                                                 |
|                                        |                                                             | UDP-N-acetylmuramoylalanyl-D-glutamyl-2,6-diaminopimelate--D-alanyl-D-alanine ligase (EC 6.3.2.10)                                 |
|                                        |                                                             | Glutamate racemase (EC 5.1.1.3)                                                                                                    |
|                                        |                                                             | UDP-N-acetylmuramate--alanine ligase (EC 6.3.2.8)                                                                                  |
|                                        |                                                             | D-alanine--D-alanine ligase (EC 6.3.2.4)                                                                                           |
|                                        |                                                             | Phospho-N-acetylmuramoyl-pentapeptide-transferase (EC 2.7.8.13)                                                                    |
|                                        |                                                             | N-acetylglucosamine-1-phosphate uridyltransferase (EC 2.7.7.23)                                                                    |
|                                        |                                                             | Multimodular transpeptidase-transglycosylase (EC 2.4.1.129) (EC 3.4.-.-)                                                           |
|                                        | UDP-N-acetylmuramate from Fructose-6-phosphate Biosynthesis | UDP-N-acetylenolpyruvoylglucosamine reductase (EC 1.1.1.158)                                                                       |
|                                        | UDP-N-acetylmuramate from Fructose-6-phosphate Biosynthesis | Glucosamine-1-phosphate N-acetyltransferase (EC 2.3.1.157)                                                                         |
|                                        |                                                             | Glucosamine--fructose-6-phosphate aminotransferase [isomerizing] (EC 2.6.1.16)                                                     |
|                                        |                                                             | UDP-N-acetylglucosamine 1-carboxyvinyltransferase (EC 2.5.1.7)                                                                     |
|                                        | YjeE                                                        | Phosphoglucosamine mutase (EC 5.4.2.10)                                                                                            |
|                                        |                                                             | N-acetylglucosamine-1-phosphate uridyltransferase (EC 2.7.7.23)                                                                    |
|                                        |                                                             | TsaB protein, required for threonylcarbamoyladenosine t(6)A formation in tRNA                                                      |
|                                        | Recycling of Peptidoglycan Amino Acids                      | NAD(P)HX epimerase                                                                                                                 |
|                                        |                                                             | TsaE protein, required for threonylcarbamoyladenosine t(6)A37 formation in tRNA                                                    |
|                                        |                                                             | NAD(P)HX dehydratase                                                                                                               |
|                                        | Peptidoglycan biosynthesis--gjo                             | N-acetylmuramoyl-L-alanine amidase (EC 3.5.1.28)                                                                                   |
|                                        |                                                             | Muramoyltetrapeptide carboxypeptidase (EC 3.4.17.13)                                                                               |
|                                        |                                                             | UDP-N-acetylmuramate--alanine ligase (EC 6.3.2.8)                                                                                  |
|                                        |                                                             | UDP-N-acetylmuramoylalanine--D-glutamate ligase (EC 6.3.2.9)                                                                       |
|                                        |                                                             | UDP-N-acetylmuramoylalanyl-D-glutamate--2,6-diaminopimelate ligase (EC 6.3.2.13)                                                   |
|                                        | Virulence, Disease and Defense                              | D-alanine--D-alanine ligase (EC 6.3.2.4)                                                                                           |
|                                        |                                                             | UDP-N-acetylmuramoylalanyl-D-glutamyl-2,6-diaminopimelate--D-alanyl-D-alanine ligase (EC 6.3.2.10)                                 |
| Virulence, Disease and Defense         | Adhesion                                                    | Streptococcus pyogenes recombinatorial zone                                                                                        |
|                                        | Resistance to antibiotics and toxic compounds               | Chaperonin (heat shock protein 33)                                                                                                 |
|                                        |                                                             | Copper homeostasis                                                                                                                 |
|                                        |                                                             | Copper-translocating P-type ATPase (EC 3.6.3.4)                                                                                    |
|                                        |                                                             | Cobalt-zinc-cadmium resistance protein                                                                                             |
|                                        |                                                             | Probable Co/Zn/Cd efflux system membrane fusion protein                                                                            |
|                                        |                                                             | Transcriptional regulator, MerR family                                                                                             |
| Virulence, Disease and Defense         | Resistance to fluoroquinolones                              | DNA gyrase subunit B (EC 5.99.1.3)                                                                                                 |
|                                        |                                                             | DNA gyrase subunit A (EC 5.99.1.3)                                                                                                 |

|                                                    |                                        |                                                            |                                       |                                                                                                             |
|----------------------------------------------------|----------------------------------------|------------------------------------------------------------|---------------------------------------|-------------------------------------------------------------------------------------------------------------|
|                                                    |                                        |                                                            | Arsenic resistance                    | Arsenical-resistance protein ACR3                                                                           |
|                                                    |                                        |                                                            |                                       | Arsenate reductase (EC 1.20.4.1)                                                                            |
|                                                    |                                        |                                                            | Beta-lactamase                        | Beta-lactamase (EC 3.5.2.6)                                                                                 |
|                                                    |                                        |                                                            | Zinc resistance                       | Response regulator of zinc sigma-54-dependent two-component system                                          |
|                                                    |                                        |                                                            | Multidrug Resistance Efflux Pumps     | Multi antimicrobial extrusion protein (Na <sup>(+)</sup> /drug antiporter), MATE family of MDR efflux pumps |
|                                                    |                                        |                                                            |                                       | Acridine resistance protein                                                                                 |
|                                                    |                                        |                                                            | Invasion and intracellular resistance | Mycobacterium virulence operon involved in protein synthesis (SSU ribosomal proteins)                       |
|                                                    |                                        |                                                            |                                       | SSU ribosomal protein S7p (S5e)                                                                             |
|                                                    |                                        |                                                            |                                       | Translation elongation factor G                                                                             |
|                                                    |                                        |                                                            |                                       | Translation elongation factor Tu                                                                            |
|                                                    |                                        |                                                            |                                       | SSU ribosomal protein S12p (S23e)                                                                           |
|                                                    |                                        |                                                            |                                       | Mycobacterium virulence operon involved in an unknown function with a Jag Protein and YidC and YidD         |
|                                                    |                                        |                                                            |                                       | RNA-binding protein Jag                                                                                     |
|                                                    |                                        |                                                            |                                       | Protein YidD                                                                                                |
|                                                    |                                        |                                                            |                                       | Inner membrane protein translocase component YidC, short form OxaI-like                                     |
|                                                    |                                        |                                                            |                                       | Mycobacterium virulence operon involved in DNA transcription                                                |
|                                                    |                                        |                                                            |                                       | DNA-directed RNA polymerase beta' subunit (EC 2.7.7.6)                                                      |
|                                                    |                                        |                                                            |                                       | DNA-directed RNA polymerase beta subunit (EC 2.7.7.6)                                                       |
|                                                    |                                        |                                                            |                                       | Mycobacterium virulence operon involved in protein synthesis (LSU ribosomal proteins)                       |
|                                                    |                                        |                                                            |                                       | LSU ribosomal protein L35p                                                                                  |
|                                                    |                                        |                                                            |                                       | Translation initiation factor 3                                                                             |
|                                                    |                                        |                                                            |                                       | LSU ribosomal protein L20p                                                                                  |
| Potassium metabolism                               | Potassium metabolism - no subcategory  | Potassium homeostasis                                      |                                       | FKBP-type peptidyl-prolyl cis-trans isomerase SlyD (EC 5.2.1.8)                                             |
|                                                    |                                        |                                                            |                                       | Trk system potassium uptake protein TrkA                                                                    |
|                                                    |                                        |                                                            |                                       | Large-conductance mechanosensitive channel                                                                  |
|                                                    |                                        |                                                            |                                       | Kup system potassium uptake protein                                                                         |
| Miscellaneous                                      | Plant-Prokaryote DOE project           | Conserved gene cluster possibly involved in RNA metabolism |                                       | CysteinyI-tRNA synthetase (EC 6.1.1.16)                                                                     |
|                                                    |                                        |                                                            |                                       | RNA polymerase sporulation specific sigma factor SigH                                                       |
|                                                    |                                        |                                                            |                                       | Serine acetyltransferase (EC 2.3.1.30)                                                                      |
|                                                    |                                        |                                                            |                                       | COG1939: Ribonuclease III family protein                                                                    |
|                                                    | Phosphoglycerate mutase protein family |                                                            |                                       | Alpha-ribazole-5'-phosphate phosphatase (EC 3.1.3.73)                                                       |
|                                                    |                                        |                                                            |                                       | Carboxyl-terminal protease (EC 3.4.21.102)                                                                  |
|                                                    |                                        |                                                            |                                       | 2,3-bisphosphoglycerate-independent phosphoglycerate mutase (EC 5.4.2.1)                                    |
|                                                    | Miscellaneous - no subcategory         | Muconate lactonizing enzyme family                         |                                       | L(+)-tartrate dehydratase beta subunit (EC 4.2.1.32)                                                        |
|                                                    |                                        |                                                            |                                       | L(+)-tartrate dehydratase alpha subunit (EC 4.2.1.32)                                                       |
|                                                    |                                        | Broadly distributed proteins not in subsystems             |                                       | YbbM seven transmembrane helix protein                                                                      |
|                                                    |                                        |                                                            |                                       | UPF0225 protein YchJ                                                                                        |
|                                                    |                                        |                                                            |                                       | UPF0265 protein YeeX                                                                                        |
| Phages, Prophages, Transposable elements, Plasmids | Phages, Prophages                      | Phage DNA synthesis                                        |                                       | Glutaredoxin                                                                                                |
|                                                    | Plasmid related functions              | Rolling-circle replication                                 |                                       | Replication initiation protein, topoisomerase                                                               |
| Membrane Transport                                 | ABC transporters                       | ABC transporter alkylphosphonate (TC 3.A.1.9.1)            |                                       | Phosphonate ABC transporter ATP-binding protein (TC 3.A.1.9.1)                                              |
|                                                    |                                        |                                                            |                                       | Phosphonate ABC transporter phosphate-binding periplasmic component (TC 3.A.1.9.1)                          |
|                                                    |                                        | ABC transporter oligopeptide (TC 3.A.1.5.1)                |                                       | Oligopeptide transport system permease protein OppC (TC 3.A.1.5.1)                                          |
|                                                    |                                        |                                                            |                                       | Oligopeptide transport system permease protein OppB (TC 3.A.1.5.1)                                          |
|                                                    |                                        |                                                            |                                       | Oligopeptide transport ATP-binding protein OppF (TC 3.A.1.5.1)                                              |
|                                                    |                                        |                                                            |                                       | Oligopeptide ABC transporter, periplasmic oligopeptide-binding protein OppA (TC 3.A.1.5.1)                  |
|                                                    |                                        | ABC transporter dipeptide (TC 3.A.1.5.2)                   |                                       | Dipeptide transport system permease protein DppB (TC 3.A.1.5.2)                                             |
|                                                    |                                        |                                                            |                                       | Dipeptide transport ATP-binding protein DppF (TC 3.A.1.5.2)                                                 |

|                                                   |                                                        |                             |                                                                                               |                                                              |
|---------------------------------------------------|--------------------------------------------------------|-----------------------------|-----------------------------------------------------------------------------------------------|--------------------------------------------------------------|
|                                                   |                                                        |                             | Dipeptide transport ATP-binding protein DppD (TC 3.A.1.5.2)                                   |                                                              |
|                                                   |                                                        |                             | Dipeptide transport system permease protein DppC (TC 3.A.1.5.2)                               |                                                              |
|                                                   |                                                        |                             | Dipeptide-binding ABC transporter, periplasmic substrate-binding component (TC 3.A.1.5.2)     |                                                              |
| Protein translocation across cytoplasmic membrane | Bacterial signal recognition particle (SRP)            |                             | Signal recognition particle, subunit Ffh SRP54 (TC 3.A.5.1.1)                                 |                                                              |
|                                                   |                                                        |                             | Signal recognition particle associated protein                                                |                                                              |
|                                                   |                                                        |                             | Signal recognition particle receptor protein FtsY (=alpha subunit) (TC 3.A.5.1.1)             |                                                              |
| Cation transporters                               | Magnesium transport                                    |                             | Magnesium and cobalt transport protein CorA                                                   |                                                              |
|                                                   |                                                        |                             | Magnesium and cobalt efflux protein CorC                                                      |                                                              |
|                                                   | Copper Transport System                                |                             | Mg/Co/Ni transporter MgtE                                                                     |                                                              |
|                                                   |                                                        |                             | Mg(2+) transport ATPase, P-type (EC 3.6.3.2)                                                  |                                                              |
| Uni- Sym- and Antiporters                         | NhaA, NhaD and Sodium-dependent phosphate transporters |                             | Copper-translocating P-type ATPase (EC 3.6.3.4)                                               |                                                              |
|                                                   |                                                        |                             | Repressor CsoR of the copZA operon                                                            |                                                              |
|                                                   |                                                        |                             | Na+/H+ antiporter NhaD type                                                                   |                                                              |
|                                                   | Choline Transport                                      |                             | Sodium-Choline Symporter                                                                      |                                                              |
| Membrane Transport - no subcategory               | ECF class transporters                                 |                             | Duplicated ATPase component MtsB of energizing module of methionine-regulated ECF transporter |                                                              |
|                                                   |                                                        |                             | Transmembrane component MtsC of energizing module of methionine-regulated ECF transporter     |                                                              |
|                                                   |                                                        |                             | Substrate-specific component STY3230 of queuosine-regulated ECF transporter                   |                                                              |
|                                                   |                                                        |                             | Substrate-specific component MtsA of methionine-regulated ECF transporter                     |                                                              |
|                                                   | Ton and Tol transport systems                          |                             | Ferric siderophore transport system, periplasmic binding protein TonB                         |                                                              |
|                                                   |                                                        |                             | Outer membrane lipoprotein omp16 precursor                                                    |                                                              |
|                                                   |                                                        |                             | MotA/TolQ/ExbB proton channel family protein                                                  |                                                              |
|                                                   |                                                        |                             | TPR repeat containing exported protein                                                        |                                                              |
|                                                   |                                                        |                             | Haemin uptake system outer membrane receptor                                                  |                                                              |
|                                                   |                                                        |                             | Biopolymer transport protein ExbD/TolR                                                        |                                                              |
| TRAP transporters                                 | TRAP Transporter collection                            |                             | TRAP-type C4-dicarboxylate transport system, large permease component                         |                                                              |
|                                                   |                                                        |                             | TRAP-type C4-dicarboxylate transport system, periplasmic component                            |                                                              |
| Iron acquisition and metabolism                   | Iron acquisition and metabolism - no subcategory       | Hemin transport system      | Haemin uptake system permease protein                                                         |                                                              |
|                                                   |                                                        |                             | Ferric siderophore transport system, periplasmic binding protein TonB                         |                                                              |
|                                                   |                                                        |                             | Haemin uptake system outer membrane receptor                                                  |                                                              |
| RNA Metabolism                                    | RNA processing and modification                        | RNA pseudouridine syntheses | Ribosomal small subunit pseudouridine synthase A (EC 4.2.1.70)                                |                                                              |
|                                                   |                                                        |                             | Ribosomal large subunit pseudouridine synthase D (EC 4.2.1.70)                                |                                                              |
|                                                   |                                                        |                             | Ribosomal large subunit pseudouridine synthase C (EC 4.2.1.70)                                |                                                              |
|                                                   |                                                        |                             | Ribosomal large subunit pseudouridine synthase B (EC 4.2.1.70)                                |                                                              |
|                                                   |                                                        |                             | RNA pseudouridylylase BT0642                                                                  |                                                              |
|                                                   |                                                        |                             | tRNA pseudouridine synthase B (EC 4.2.1.70)                                                   |                                                              |
|                                                   |                                                        |                             | tRNA pseudouridine synthase A (EC 4.2.1.70)                                                   |                                                              |
|                                                   |                                                        | tRNA nucleotidyltransferase | tRNA nucleotidyltransferase (EC 2.7.7.21) (EC 2.7.7.25)                                       |                                                              |
|                                                   |                                                        | Methylthiotransferases      |                                                                                               | tRNA-t(6)A37 methylthiotransferase                           |
|                                                   |                                                        |                             |                                                                                               | tRNA-i(6)A37 methylthiotransferase                           |
|                                                   |                                                        |                             |                                                                                               | Ribosomal protein S12p Asp88 (E. coli) methylthiotransferase |
|                                                   |                                                        |                             |                                                                                               | Ribonucleases in Bacillus                                    |
|                                                   |                                                        |                             |                                                                                               | Ribonuclease HII (EC 3.1.26.4)                               |
|                                                   |                                                        |                             | Ribonuclease J2 (endoribonuclease in RNA processing)                                          |                                                              |

|                                                 |                                                                                     |
|-------------------------------------------------|-------------------------------------------------------------------------------------|
| RNA processing and degradation, bacterial       | Cytoplasmic axial filament protein CafA and Ribonuclease G (EC 3.1.4.-)             |
|                                                 | 3'-to-5' exoribonuclease RNase R                                                    |
|                                                 | FIG146085: 3'-to-5' oligoribonuclease A, Bacillus type                              |
| RNA methylation                                 | Ribonuclease III (EC 3.1.26.3)                                                      |
|                                                 | tRNA (guanosine(18)-2'-O)-methyltransferase (EC 2.1.1.34)                           |
|                                                 | tRNA (adenine37-N(6))-methyltransferase TrmN6 (EC 2.1.1.223)                        |
|                                                 | Ribosomal RNA small subunit methyltransferase E (EC 2.1.1.-)                        |
|                                                 | Ribosomal RNA large subunit methyltransferase F (EC 2.1.1.51)                       |
|                                                 | LSU m5C1962 methyltransferase RlmI                                                  |
|                                                 | SSU rRNA (adenine(1518)-N(6)/adenine(1519)-N(6))-dimethyltransferase (EC 2.1.1.182) |
|                                                 | 23S rRNA (guanosine-2'-O-) -methyltransferase rlmB (EC 2.1.1.-)                     |
|                                                 | tRNA (guanine46-N7)-methyltransferase (EC 2.1.1.33)                                 |
|                                                 | Ribosomal RNA large subunit methyltransferase N (EC 2.1.1.-)                        |
|                                                 | tRNA (Guanine37-N1) -methyltransferase (EC 2.1.1.31)                                |
|                                                 | tRNA (5-methylaminomethyl-2-thiouridylate)-methyltransferase (EC 2.1.1.61)          |
|                                                 | tRNA (cytidine(34)-2'-O)-methyltransferase (EC 2.1.1.207)                           |
|                                                 | LSU m3Psi1915 methyltransferase RlmH                                                |
| ATP-dependent RNA helicases, bacterial          | rRNA small subunit 7-methylguanosine (m7G) methyltransferase GidB                   |
|                                                 | tRNA-specific 2-thiouridylase MnmA                                                  |
| 16S rRNA modification within P site of ribosome | ATP-dependent RNA helicase RhlE                                                     |
|                                                 | ATP-dependent RNA helicase BA2475                                                   |
|                                                 | Cell division protein FtsI [Peptidoglycan synthetase] (EC 2.4.1.129)                |
| mm5U34 biosynthesis bacteria                    | rRNA small subunit methyltransferase H                                              |
|                                                 | rRNA small subunit methyltransferase I                                              |
|                                                 | GTPase and tRNA-U34 5-formylation enzyme TrmE                                       |
|                                                 | tRNA uridine 5-carboxymethylaminomethyl modification enzyme GidA                    |
|                                                 | tRNA (5-methylaminomethyl-2-thiouridylate)-methyltransferase (EC 2.1.1.61)          |
|                                                 | Cysteine desulfurase (EC 2.8.1.7)                                                   |
| Queuosine-Archaeosine Biosynthesis              | preQ1-regulated inosine-uridine nucleoside hydrolase (EC 3.2.2.1)                   |
|                                                 | Peptidyl-prolyl cis-trans isomerase (EC 5.2.1.8)                                    |
|                                                 | Inosine-uridine preferring nucleoside hydrolase (EC 3.2.2.1)                        |
|                                                 | Putative preQ0 transporter                                                          |
|                                                 | S-adenosylmethionine:tRNA ribosyltransferase-isomerase (EC 5.-.-)                   |
|                                                 | Permease of the drug/metabolite transporter (DMT) superfamily                       |
|                                                 | GTP cyclohydrolase I (EC 3.5.4.16) type 1                                           |
|                                                 | tRNA-guanine transglycosylase (EC 2.4.2.29)                                         |
| Ribonuclease H                                  | Substrate-specific component STY3230 of queuosine-regulated ECF transporter         |
|                                                 | Ribonuclease HII (EC 3.1.26.4)                                                      |
|                                                 | Ribonuclease P protein component (EC 3.1.26.5)                                      |
| tRNA processing                                 | tRNA-i(6)A37 methylthiotransferase                                                  |
|                                                 | tRNA dimethylallyltransferase (EC 2.5.1.75)                                         |
|                                                 | tRNA(Ile)-lysidine synthetase (EC 6.3.4.19)                                         |
|                                                 | Ribonuclease PH (EC 2.7.7.56)                                                       |
|                                                 | tRNA pseudouridine synthase B (EC 4.2.1.70)                                         |
| Transcription                                   | tRNA pseudouridine synthase A (EC 4.2.1.70)                                         |
|                                                 | RNA polymerase sigma-54 factor RpoN                                                 |
|                                                 | RNA polymerase sigma factor RpoD                                                    |
|                                                 | RNA polymerase sporulation specific sigma factor SigH                               |
|                                                 | DNA-directed RNA polymerase alpha subunit (EC 2.7.7.6)                              |

|                             |                                        |                                                                                         |
|-----------------------------|----------------------------------------|-----------------------------------------------------------------------------------------|
| Nucleosides and Nucleotides | RNA polymerase bacterial               | DNA-directed RNA polymerase beta' subunit (EC 2.7.7.6)                                  |
|                             |                                        | DNA-directed RNA polymerase omega subunit (EC 2.7.7.6)                                  |
|                             | Transcription factors bacterial        | DNA-directed RNA polymerase beta subunit (EC 2.7.7.6)                                   |
|                             |                                        | Transcription termination protein NusB                                                  |
|                             |                                        | Transcription accessory protein (S1 RNA-binding domain)                                 |
|                             |                                        | Transcription termination factor Rho                                                    |
|                             |                                        | Transcription antitermination protein NusG                                              |
|                             |                                        | Transcription-repair coupling factor                                                    |
|                             |                                        | ribosomal protein L7Ae family protein                                                   |
|                             |                                        | COG2740: Predicted nucleic-acid-binding protein implicated in transcription termination |
|                             |                                        | FIG000325: clustered with transcription termination protein NusA                        |
|                             |                                        | Transcription termination protein NusA                                                  |
|                             | Rrf2 family transcriptional regulators | Rrf2 family transcriptional regulator                                                   |
|                             | RNA Metabolism - no subcategory        | Group II intron-associated genes                                                        |
|                             | pyrimidine conversions                 | Retron-type RNA-directed DNA polymerase (EC 2.7.7.49)                                   |
|                             |                                        | Nucleoside diphosphate kinase (EC 2.7.4.6)                                              |
|                             |                                        | Uridine kinase (EC 2.7.1.48) [C1]                                                       |
|                             |                                        | Thymidylate kinase (EC 2.7.4.9)                                                         |
|                             |                                        | Cytosine deaminase (EC 3.5.4.1)                                                         |
|                             |                                        | Thioredoxin reductase (EC 1.8.1.9)                                                      |
|                             |                                        | Pyrimidine-nucleoside phosphorylase (EC 2.4.2.2)                                        |
|                             |                                        | Cytidylate kinase (EC 2.7.4.25)                                                         |
|                             |                                        | Thymidine kinase (EC 2.7.1.21)                                                          |
|                             |                                        | Bis(5'-nucleosyl)-tetraphosphatase (asymmetrical) (EC 3.6.1.17)                         |
| Nucleosides and Nucleotides | Pyrimidines                            | Purine nucleoside phosphorylase (EC 2.4.2.1)                                            |
|                             |                                        | 5'-nucleotidase (EC 3.1.3.5)                                                            |
|                             |                                        | Cytidine deaminase (EC 3.5.4.5)                                                         |
|                             |                                        | Uridine kinase (EC 2.7.1.48)                                                            |
|                             |                                        | Uracil phosphoribosyltransferase (EC 2.4.2.9)                                           |
|                             |                                        | 2',3'-cyclic-nucleotide 2'-phosphodiesterase (EC 3.1.4.16)                              |
|                             |                                        | CTP synthase (EC 6.3.4.2)                                                               |
|                             |                                        | Uracil permease                                                                         |
|                             |                                        | Orotidine 5'-phosphate decarboxylase (EC 4.1.1.23)                                      |
|                             |                                        | Dihydroorotate dehydrogenase electron transfer subunit (EC 1.3.3.1)                     |
| Nucleosides and Nucleotides | De Novo Pyrimidine Synthesis           | Aspartate carbamoyltransferase (EC 2.1.3.2)                                             |
|                             |                                        | Dihydroorotate dehydrogenase, catalytic subunit (EC 1.3.3.1)                            |
|                             |                                        | Carbamoyl-phosphate synthase small chain (EC 6.3.5.5)                                   |
|                             |                                        | Orotate phosphoribosyltransferase (EC 2.4.2.10)                                         |
|                             |                                        | Carbamoyl-phosphate synthase large chain (EC 6.3.5.5)                                   |
|                             |                                        | Uracil phosphoribosyltransferase (EC 2.4.2.9)                                           |
|                             |                                        | Dihydroorotase (EC 3.5.2.3)                                                             |
|                             |                                        | Phosphoribosylamine--glycine ligase (EC 6.3.4.13)                                       |
|                             |                                        | IMP cyclohydrolase (EC 3.5.4.10)                                                        |
|                             |                                        | Amidophosphoribosyltransferase (EC 2.4.2.14)                                            |
| Nucleosides and Nucleotides | Purines                                | Ribose-phosphate pyrophosphokinase (EC 2.7.6.1)                                         |
|                             |                                        | Phosphoribosylaminoimidazole carboxylase catalytic subunit (EC 4.1.1.21)                |
|                             |                                        | Phosphoribosylglycinamide formyltransferase (EC 2.1.2.2)                                |
|                             |                                        | Phosphoribosylaminoimidazole-succinocarboxamide synthase (EC 6.3.2.6)                   |
|                             |                                        | Adenylosuccinate lyase (EC 4.3.2.2)                                                     |
|                             |                                        | Phosphoribosylformylglycinamide cyclo-ligase (EC 6.3.3.1)                               |



|                                 |                                                     |                                                                                           |
|---------------------------------|-----------------------------------------------------|-------------------------------------------------------------------------------------------|
|                                 |                                                     | Phosphoribosylaminoimidazolecarboxamide formyltransferase (EC 2.1.2.3)                    |
|                                 |                                                     | Phosphoribosylformylglycinamide synthase, synthetase subunit (EC 6.3.5.3)                 |
|                                 |                                                     | Phosphoribosylaminoimidazole carboxylase ATPase subunit (EC 4.1.1.21)                     |
|                                 |                                                     | Phosphoribosylformylglycinamide synthase, glutamine amidotransferase subunit (EC 6.3.5.3) |
| Xanthine Metabolism in Bacteria |                                                     | Xanthine phosphoribosyltransferase (EC 2.4.2.22)                                          |
| Purine Utilization              |                                                     | Xanthine/uracil/thiamine/ascorbate permease family protein                                |
|                                 |                                                     | Xanthine and CO dehydrogenases maturation factor, XdhC/CoxF family                        |
|                                 |                                                     | Uracil-xanthine permease                                                                  |
|                                 |                                                     | preQ1-regulated inosine-uridine nucleoside hydrolase (EC 3.2.2.1)                         |
|                                 |                                                     | GMP synthase [glutamine-hydrolyzing] (EC 6.3.5.2)                                         |
|                                 |                                                     | Adenylosuccinate synthetase (EC 6.3.4.4)                                                  |
|                                 |                                                     | Inosine-5'-monophosphate dehydrogenase (EC 1.1.1.205)                                     |
|                                 |                                                     | Hypoxanthine-guanine phosphoribosyltransferase (EC 2.4.2.8)                               |
|                                 |                                                     | Possible hypoxanthine oxidase XdhD (EC 1.-.-.-)                                           |
|                                 |                                                     | Adenylosuccinate lyase (EC 4.3.2.2)                                                       |
|                                 |                                                     | Polyphosphate kinase (EC 2.7.4.1)                                                         |
|                                 |                                                     | Deoxyadenosine kinase (EC 2.7.1.76)                                                       |
|                                 |                                                     | Adenine phosphoribosyltransferase (EC 2.4.2.7)                                            |
| Purine conversions              |                                                     | 2',3'-cyclic-nucleotide 2'-phosphodiesterase (EC 3.1.4.16)                                |
|                                 |                                                     | Adenylate kinase (EC 2.7.4.3)                                                             |
|                                 |                                                     | Inosine-uridine preferring nucleoside hydrolase (EC 3.2.2.1)                              |
|                                 |                                                     | Nucleoside diphosphate kinase (EC 2.7.4.6)                                                |
|                                 |                                                     | Deoxyguanosine kinase (EC 2.7.1.113)                                                      |
|                                 |                                                     | Adenine deaminase (EC 3.5.4.2)                                                            |
|                                 |                                                     | Purine nucleoside phosphorylase (EC 2.4.2.1)                                              |
|                                 |                                                     | 5'-nucleotidase (EC 3.1.3.5)                                                              |
|                                 |                                                     | Xanthine phosphoribosyltransferase (EC 2.4.2.22)                                          |
|                                 |                                                     | Adenosine deaminase (EC 3.5.4.4)                                                          |
|                                 |                                                     | Guanylate kinase (EC 2.7.4.8)                                                             |
|                                 |                                                     | Ribonucleotide reductase of class III (anaerobic), activating protein (EC 1.97.1.4)       |
|                                 |                                                     | Ribonucleotide reductase of class III (anaerobic), large subunit (EC 1.17.4.2)            |
| Ribonucleotide reduction        |                                                     | Ribonucleotide reductase of class Ia (aerobic), beta subunit (EC 1.17.4.1)                |
|                                 |                                                     | Ribonucleotide reductase of class Ia (aerobic), alpha subunit (EC 1.17.4.1)               |
|                                 |                                                     | Ribonucleotide reductase transcriptional regulator NrdR                                   |
| Pseudouridine catabolism        |                                                     | Pseudouridine 5'-phosphate glycosidase                                                    |
|                                 |                                                     | Pseudouridine kinase (EC 2.7.1.83)                                                        |
|                                 |                                                     | S-adenosylhomocysteine nucleosidase (EC 3.2.2.9)                                          |
| Adenosyl nucleosidases          |                                                     | Purine nucleoside phosphorylase (EC 2.4.2.1)                                              |
|                                 |                                                     | 5'-methylthioadenosine nucleosidase (EC 3.2.2.16)                                         |
|                                 | Nucleoside triphosphate pyrophosphohydrolase MazG   | Nucleoside triphosphate pyrophosphohydrolase MazG (EC 3.6.1.8)                            |
| Detoxification                  | Nudix proteins (nucleoside triphosphate hydrolases) | Deoxyuridine 5'-triphosphate nucleotidohydrolase (EC 3.6.1.23)                            |
|                                 |                                                     | Hypothetical nudix hydrolase YeaB                                                         |
|                                 |                                                     | Deoxyuridine 5'-triphosphate nucleotidohydrolase (EC 3.6.1.23)                            |

|                      |                                          |                                                        |                                                                                         |
|----------------------|------------------------------------------|--------------------------------------------------------|-----------------------------------------------------------------------------------------|
|                      |                                          | Housecleaning nucleoside triphosphate pyrophosphatases | Nucleoside 5-triphosphatase RdgB (dHATP, dITP, XTP-specific) (EC 3.6.1.15)              |
|                      |                                          |                                                        | 5'-nucleotidase YjjG (EC 3.1.3.5)                                                       |
| Protein folding      | GroEL GroES                              |                                                        | Heat shock protein GrpE                                                                 |
|                      |                                          |                                                        | Heat-inducible transcription repressor HrcA                                             |
|                      |                                          |                                                        | Chaperone protein DnaK                                                                  |
|                      |                                          |                                                        | Chaperone protein DnaJ                                                                  |
|                      |                                          |                                                        | Heat shock protein 60 family chaperone GroEL                                            |
|                      | Protein chaperones                       |                                                        | Heat shock protein GrpE                                                                 |
|                      |                                          |                                                        | Chaperone protein DnaK                                                                  |
|                      |                                          |                                                        | Chaperone protein DnaJ                                                                  |
|                      |                                          |                                                        | Chaperone protein HtpG                                                                  |
|                      |                                          |                                                        | ClpB protein                                                                            |
| Protein Metabolism   | Periplasmic disulfide interchange        |                                                        | Cytochrome c-type biogenesis protein CcdA (DsbD analog)                                 |
|                      |                                          |                                                        |                                                                                         |
|                      | Peptidyl-prolyl cis-trans isomerase      |                                                        | Survival protein SurA precursor (Peptidyl-prolyl cis-trans isomerase SurA) (EC 5.2.1.8) |
|                      |                                          |                                                        | FKBP-type peptidyl-prolyl cis-trans isomerase SlyD (EC 5.2.1.8)                         |
|                      | Selenoproteins                           | Selenocysteine metabolism                              | selenocysteine-containing                                                               |
|                      |                                          |                                                        | L-seryl-tRNA(Sec) selenium transferase (EC 2.9.1.1)                                     |
|                      |                                          |                                                        | Selenophosphate-dependent tRNA 2-selenouridine synthase                                 |
|                      |                                          |                                                        | Selenocysteine-specific translation elongation factor                                   |
|                      |                                          |                                                        | Selenide, water dikinase (EC 2.7.9.3)                                                   |
|                      |                                          |                                                        |                                                                                         |
|                      |                                          |                                                        |                                                                                         |
|                      |                                          |                                                        |                                                                                         |
| Protein biosynthesis | tRNA aminoacylation, Val                 |                                                        | Valyl-tRNA synthetase (EC 6.1.1.9)                                                      |
|                      |                                          |                                                        |                                                                                         |
|                      |                                          |                                                        |                                                                                         |
|                      |                                          |                                                        |                                                                                         |
|                      | tRNA aminoacylation, Met                 |                                                        | Methionyl-tRNA synthetase (EC 6.1.1.10)                                                 |
|                      |                                          |                                                        |                                                                                         |
|                      |                                          |                                                        |                                                                                         |
|                      |                                          |                                                        |                                                                                         |
|                      | tRNA aminoacylation, Ile                 |                                                        | Isoleucyl-tRNA synthetase (EC 6.1.1.5)                                                  |
|                      |                                          |                                                        |                                                                                         |
|                      |                                          |                                                        |                                                                                         |
|                      |                                          |                                                        |                                                                                         |
|                      | tRNA aminoacylation, Arg                 |                                                        | Arginyl-tRNA synthetase (EC 6.1.1.19)                                                   |
|                      |                                          |                                                        |                                                                                         |
|                      |                                          |                                                        |                                                                                         |
|                      |                                          |                                                        |                                                                                         |
|                      | Translation initiation factors bacterial |                                                        | Translation initiation factor 1                                                         |
|                      |                                          |                                                        | Methionyl-tRNA formyltransferase (EC 2.1.2.9)                                           |
|                      |                                          |                                                        | Translation initiation factor 3                                                         |
|                      |                                          |                                                        | Translation initiation factor 2                                                         |
|                      | tRNA aminoacylation, Gly                 |                                                        | Ribosome-binding factor A                                                               |
|                      |                                          |                                                        |                                                                                         |
|                      |                                          |                                                        |                                                                                         |
|                      |                                          |                                                        |                                                                                         |
|                      | tRNA aminoacylation, Ala                 |                                                        | Glycyl-tRNA synthetase alpha chain (EC 6.1.1.14)                                        |
|                      |                                          |                                                        | Glycyl-tRNA synthetase beta chain (EC 6.1.1.14)                                         |
|                      |                                          |                                                        | Alanyl-tRNA synthetase family protein                                                   |
|                      |                                          |                                                        | Alanyl-tRNA synthetase (EC 6.1.1.7)                                                     |
|                      | tRNA aminoacylation, Trp                 |                                                        |                                                                                         |
|                      |                                          |                                                        |                                                                                         |
|                      |                                          |                                                        |                                                                                         |
|                      |                                          |                                                        |                                                                                         |
| Protein biosynthesis | Ribosome biogenesis bacterial            |                                                        | Tryptophanyl-tRNA synthetase (EC 6.1.1.2)                                               |
|                      |                                          |                                                        |                                                                                         |
|                      |                                          |                                                        |                                                                                         |
|                      |                                          |                                                        |                                                                                         |
|                      |                                          |                                                        | 16S rRNA processing protein RimM                                                        |
|                      |                                          |                                                        | TsaB protein, required for threonylcarbamoyladenosine (t(6)A) formation in tRNA         |
|                      |                                          |                                                        | Ribosomal large subunit pseudouridine synthase D (EC 4.2.1.70)                          |
|                      |                                          |                                                        | Ribosomal large subunit pseudouridine synthase C (EC 4.2.1.70)                          |
|                      |                                          |                                                        | LSU m5C1962 methyltransferase RlmI                                                      |
|                      |                                          |                                                        | SSU rRNA (adenine(1518)-N(6)/adenine(1519)-N(6))-dimethyltransferase (EC 2.1.1.182)     |
|                      |                                          |                                                        | tRNA (Guanine37-N1) -methyltransferase (EC 2.1.1.31)                                    |
|                      |                                          |                                                        | Ribosomal-protein-S18p-alanine acetyltransferase (EC 2.3.1.-)                           |
| Protein biosynthesis |                                          |                                                        | Ribonuclease M5 (EC 3.1.26.8)                                                           |
|                      |                                          |                                                        | LSU m3Psi1915 methyltransferase RlmH                                                    |
| Protein biosynthesis |                                          |                                                        | Ribosomal protein L11 methyltransferase (EC 2.1.1.-)                                    |
|                      |                                          |                                                        |                                                                                         |
|                      |                                          |                                                        | programmed frameshift-containing                                                        |
|                      |                                          |                                                        |                                                                                         |

|                                              |                                                                                                          |
|----------------------------------------------|----------------------------------------------------------------------------------------------------------|
|                                              | Peptide chain release factor 2                                                                           |
| tRNA aminoacylation,<br>Cys                  | Cysteinyl-tRNA synthetase (EC 6.1.1.16)                                                                  |
| Translation termination<br>factors bacterial | Protein-N(5)-glutamine methyltransferase PrmC, methylates poly-peptide chain release factors RF1 and RF2 |
|                                              | Ribosome recycling factor                                                                                |
|                                              | Peptidyl-tRNA hydrolase (EC 3.1.1.29)                                                                    |
|                                              | Peptide deformylase (EC 3.5.1.88)                                                                        |
|                                              | tmRNA-binding protein SmpB                                                                               |
|                                              | Peptide chain release factor 1                                                                           |
| Universal GTPases                            | Methionine aminopeptidase (EC 3.4.11.18)                                                                 |
|                                              | Peptide chain release factor 2                                                                           |
|                                              | Signal recognition particle, subunit Ffh SRP54 (TC 3.A.5.1.1)                                            |
|                                              | GTP-binding protein EngA                                                                                 |
|                                              | GTP-binding protein YqeH, required for biogenesis of 30S ribosome subunit                                |
|                                              | GTP-binding protein HflX                                                                                 |
|                                              | Signal recognition particle receptor protein FtsY (=alpha subunit) (TC 3.A.5.1.1)                        |
|                                              | 50S ribosomal subunit maturation GTPase RbgA (B. subtilis YlqF)                                          |
|                                              | GTP-binding protein TypA/BipA                                                                            |
|                                              | Translation elongation factor LepA                                                                       |
|                                              | Translation initiation factor 2                                                                          |
|                                              | Ribosome small subunit-stimulated GTPase EngC                                                            |
|                                              | Probable GTPase related to EngC                                                                          |
|                                              | Translation elongation factor G                                                                          |
|                                              | GTP-binding protein Era                                                                                  |
|                                              | GTPase and tRNA-U34 5-formylation enzyme TrmE                                                            |
|                                              | GTP-binding and nucleic acid-binding protein YchF                                                        |
|                                              | Translation elongation factor Tu                                                                         |
|                                              | GTP-binding protein Obg                                                                                  |
|                                              | GTP-binding protein EngB                                                                                 |
| tRNA aminoacylation,<br>His                  | Histidyl-tRNA synthetase (EC 6.1.1.21)                                                                   |
| tRNA aminoacylation,<br>Asp and Asn          | Aspartyl-tRNA(Asn) amidotransferase subunit C (EC 6.3.5.6)                                               |
|                                              | Aspartyl-tRNA(Asn) amidotransferase subunit B (EC 6.3.5.6)                                               |
| tRNA aminoacylation,<br>Asp and Asn          | Aspartyl-tRNA synthetase (EC 6.1.1.12)                                                                   |
|                                              | Asparaginyl-tRNA synthetase (EC 6.1.1.22)                                                                |
|                                              | Aspartyl-tRNA(Asn) amidotransferase subunit A (EC 6.3.5.6)                                               |
| Translation elongation<br>factors bacterial  | Translation elongation factor G                                                                          |
|                                              | Translation elongation factor LepA                                                                       |
|                                              | Translation elongation factor Tu                                                                         |
|                                              | Translation elongation factor Ts                                                                         |
|                                              | Translation elongation factor P                                                                          |
|                                              | Translation elongation factor G-related protein                                                          |
| tRNA aminoacylation,<br>Lys                  | Lysyl-tRNA synthetase (class II) (EC 6.1.1.6)                                                            |
| tRNA aminoacylation,<br>Thr                  | Threonyl-tRNA synthetase (EC 6.1.1.3)                                                                    |
| tRNA aminoacylation,<br>Pro                  | Prolyl-tRNA synthetase (EC 6.1.1.15), bacterial type                                                     |
| Translation elongation<br>factor G family    | Translation elongation factor G                                                                          |
|                                              | Tetracycline resistance protein TetP                                                                     |
|                                              | Translation elongation factor G-related protein                                                          |
|                                              | Glutamyl-tRNA(Gln) amidotransferase subunit A (EC 6.3.5.7)                                               |

|                                     |                                                           |                                                                                         |
|-------------------------------------|-----------------------------------------------------------|-----------------------------------------------------------------------------------------|
|                                     |                                                           | Glutamyl-tRNA synthetase (EC 6.1.1.17)                                                  |
|                                     |                                                           | Glutamyl-tRNA(Gln) amidotransferase subunit B (EC 6.3.5.7)                              |
|                                     | tRNA aminoacylation, Glu and Gln                          | Glutamyl-tRNA(Gln) synthetase (EC 6.1.1.24)                                             |
|                                     |                                                           | Glutamyl-tRNA(Gln) amidotransferase subunit C (EC 6.3.5.7)                              |
|                                     | tRNA aminoacylation, Ser                                  | Seryl-tRNA synthetase (EC 6.1.1.11)                                                     |
|                                     | tRNA aminoacylation, Tyr                                  | Tyrosyl-tRNA synthetase (EC 6.1.1.1)                                                    |
|                                     | tRNA aminoacylation, Leu                                  | Leucyl-tRNA synthetase (EC 6.1.1.4)                                                     |
|                                     | Glycyl-tRNA synthetase                                    | Glycyl-tRNA synthetase alpha chain (EC 6.1.1.14)                                        |
|                                     |                                                           | Glycyl-tRNA synthetase beta chain (EC 6.1.1.14)                                         |
|                                     | tRNA aminoacylation, Phe                                  | Phenylalanyl-tRNA synthetase alpha chain (EC 6.1.1.20)                                  |
|                                     |                                                           | Phenylalanyl-tRNA synthetase beta chain (EC 6.1.1.20)                                   |
| Protein processing and modification | Lipoprotein Biosynthesis                                  | Lipoprotein signal peptidase (EC 3.4.23.36)                                             |
|                                     |                                                           | Prolipoprotein diacylglycerol transferase (EC 2.4.99.-)                                 |
|                                     | Signal peptidase                                          | Signal peptidase I (EC 3.4.21.89)                                                       |
|                                     |                                                           | Lipoprotein signal peptidase (EC 3.4.23.36)                                             |
|                                     | Ribosomal protein S12p Asp methylthiotransferase          | Ribosomal protein S12p Asp88 (E. coli) methylthiotransferase                            |
|                                     |                                                           | SSU ribosomal protein S12p (S23e)                                                       |
|                                     | G3E family of P-loop GTPases (metallocenter biosynthesis) | Urease accessory protein UreD                                                           |
|                                     |                                                           | FKBP-type peptidyl-prolyl cis-trans isomerase SlyD (EC 5.2.1.8)                         |
|                                     |                                                           | Urease accessory protein UreF                                                           |
|                                     |                                                           | Urease beta subunit (EC 3.5.1.5)                                                        |
|                                     |                                                           | Urease accessory protein UreG                                                           |
|                                     |                                                           | Urease gamma subunit (EC 3.5.1.5)                                                       |
|                                     |                                                           | Urease alpha subunit (EC 3.5.1.5)                                                       |
|                                     | Peptide methionine sulfoxide reductase                    | Peptide methionine sulfoxide reductase MsrA (EC 1.8.4.11)                               |
|                                     |                                                           | Peptide methionine sulfoxide reductase MsrB (EC 1.8.4.12)                               |
|                                     | Putative TldE-TldD proteolytic complex                    | TldE protein, part of TldE/TldD proteolytic complex                                     |
|                                     |                                                           | TldD protein, part of TldE/TldD proteolytic complex                                     |
|                                     | Aminopeptidases (EC 3.4.11.-)                             | Xaa-Pro aminopeptidase (EC 3.4.11.9)                                                    |
|                                     |                                                           | Cytosol aminopeptidase PepA (EC 3.4.11.1)                                               |
| Protein degradation                 | Protein degradation                                       | Deblocking aminopeptidase (EC 3.4.11.-)                                                 |
|                                     |                                                           | Aminopeptidase YpdF (MP-, MA-, MS-, AP-, NP- specific)                                  |
|                                     | Metalloprotease (EC 3.4.17.-)                             | D-alanyl-D-alanine carboxypeptidase (EC 3.4.16.4)                                       |
|                                     |                                                           | Muramoyltetrapeptide carboxypeptidase (EC 3.4.17.13)                                    |
|                                     |                                                           | Thermostable carboxypeptidase 1 (EC 3.4.17.19)                                          |
|                                     | Proteolysis in bacteria, ATP-dependent                    | DNA repair protein RadA                                                                 |
|                                     |                                                           | ATP-dependent Clp protease ATP-binding subunit ClpX                                     |
|                                     |                                                           | ATP-dependent Clp protease proteolytic subunit (EC 3.4.21.92)                           |
|                                     |                                                           | ClpB protein                                                                            |
|                                     | Omega peptidases (EC 3.4.19.-)                            | ATP-dependent protease La (EC 3.4.21.53) Type I                                         |
|                                     |                                                           | Pyrrolidone-carboxylate peptidase (EC 3.4.19.3)                                         |
| Cell Division and Cell Cycle        | YgjD and YeaZ                                             | TsaD/Kae1/Qri7 protein, required for threonylcarbamoyladenine t(6)A37 formation in tRNA |
|                                     |                                                           | TsaB protein, required for threonylcarbamoyladenine t(6)A formation in tRNA             |
|                                     | Macromolecular synthesis operon                           | TsaD/Kae1/Qri7 protein, required for threonylcarbamoyladenine t(6)A37 formation in tRNA |
|                                     |                                                           | RNA polymerase sigma factor RpoD                                                        |
|                                     |                                                           | DNA primase (EC 2.7.7.-)                                                                |
|                                     |                                                           | Carbamoyl-phosphate synthase small chain (EC 6.3.5.5)                                   |
|                                     |                                                           | Carbamoyl-phosphate synthase large chain (EC 6.3.5.5)                                   |

|                               |                                                 |                                                                   |                                                                      |
|-------------------------------|-------------------------------------------------|-------------------------------------------------------------------|----------------------------------------------------------------------|
| Regulation and Cell signaling | Regulation and Cell signaling - no sub-category | Bacterial Cytoskeleton                                            | Septum site-determining protein MinC                                 |
|                               |                                                 |                                                                   | Cell division protein FtsI [Peptidoglycan synthetase] (EC 2.4.1.129) |
|                               |                                                 |                                                                   | Rod shape-determining protein RodA                                   |
|                               |                                                 |                                                                   | Cell division protein FtsW                                           |
|                               |                                                 |                                                                   | Cell division protein FtsZ (EC 3.4.24.-)                             |
|                               |                                                 |                                                                   | Cell division protein FtsA                                           |
|                               |                                                 |                                                                   | Rod shape-determining protein MreB                                   |
|                               |                                                 |                                                                   | Rod shape-determining protein MreC                                   |
|                               |                                                 |                                                                   | Septum formation protein Maf                                         |
|                               |                                                 |                                                                   | Septum site-determining protein MinD                                 |
|                               |                                                 |                                                                   | Cell division topological specificity factor MinE                    |
|                               |                                                 |                                                                   | Chromosome (plasmid) partitioning protein ParA                       |
|                               |                                                 |                                                                   | ElaA protein                                                         |
|                               |                                                 |                                                                   | ATP-dependent Clp protease proteolytic subunit (EC 3.4.21.92)        |
|                               |                                                 |                                                                   | Adenylate cyclase (EC 4.6.1.1)                                       |
|                               |                                                 |                                                                   | Adenine phosphoribosyltransferase (EC 2.4.2.7)                       |
|                               |                                                 |                                                                   | 3',5'-cyclic-nucleotide phosphodiesterase (EC 3.1.4.17)              |
|                               |                                                 |                                                                   | Catabolite control protein A                                         |
|                               |                                                 |                                                                   | HPr kinase/phosphorylase (EC 2.7.1.-) (EC 2.7.4.-)                   |
| Regulation and Cell signaling | Regulation and Cell signaling - no sub-category | cAMP signaling in bacteria                                        | GTP pyrophosphokinase (EC 2.7.6.5), (p)ppGpp synthetase I            |
|                               |                                                 | HPr catabolite repression system                                  |                                                                      |
|                               |                                                 | Stringent Response, (p)ppGpp metabolism                           |                                                                      |
|                               |                                                 | Programmed Cell Death and Toxin-antitoxin Systems                 |                                                                      |
|                               |                                                 | Toxin-antitoxin replicon stabilization systems                    | DNA-damage-inducible protein J                                       |
| Secondary Metabolism          | Plant Alkaloids                                 | Alkaloid biosynthesis from L-lysine                               | Oxalyl-CoA decarboxylase (EC 4.1.1.8)                                |
|                               |                                                 | Uracil-DNA glycosylase                                            | Uracil-DNA glycosylase, family 1                                     |
|                               |                                                 | DNA repair, bacterial MutL-MutS system                            | Recombination inhibitory protein MutS2                               |
|                               |                                                 |                                                                   | DNA mismatch repair protein MutS                                     |
|                               |                                                 |                                                                   | DNA mismatch repair protein MutL                                     |
|                               |                                                 | DNA repair, UvrABC system                                         | Excinuclease ABC subunit C                                           |
|                               |                                                 |                                                                   | Excinuclease ABC subunit A                                           |
|                               |                                                 |                                                                   | Excinuclease ABC subunit B                                           |
|                               |                                                 | DNA repair, bacterial photolyase                                  | Deoxyribodipyrimidine photolyase, type II (EC 4.1.99.3)              |
|                               |                                                 | DNA repair, bacterial DinG and relatives                          | DinG family ATP-dependent helicase YoaA                              |
| DNA Metabolism                | DNA repair                                      | DNA repair system including RecA, MutS and a hypothetical protein | DNA mismatch repair protein MutS                                     |
|                               |                                                 |                                                                   | RecA protein                                                         |
|                               |                                                 |                                                                   | Exodeoxyribonuclease VII large subunit (EC 3.1.11.6)                 |
|                               |                                                 |                                                                   | DNA repair protein RadaA                                             |
|                               |                                                 |                                                                   | Exonuclease SbcD                                                     |
|                               |                                                 |                                                                   | DNA repair protein RecN                                              |
|                               |                                                 |                                                                   | DNA repair protein RadC                                              |
|                               |                                                 |                                                                   | DNA polymerase IV (EC 2.7.7.7)                                       |
|                               |                                                 |                                                                   | Exonuclease SbcC                                                     |
|                               |                                                 | DNA repair, bacterial                                             | DNA-damage-inducible protein J                                       |
|                               |                                                 |                                                                   | Single-stranded DNA-binding protein                                  |
|                               |                                                 |                                                                   | Methylated-DNA--protein-cysteine methyltransferase (EC 2.1.1.63)     |
|                               |                                                 |                                                                   | Endonuclease IV (EC 3.1.21.2)                                        |
|                               |                                                 |                                                                   | RecA protein                                                         |
|                               |                                                 |                                                                   | Exodeoxyribonuclease III (EC 3.1.11.2)                               |
|                               |                                                 |                                                                   | Exodeoxyribonuclease VII small subunit (EC 3.1.11.6)                 |
|                               |                                                 |                                                                   | ATP-dependent DNA helicase RecQ                                      |

|                                      |                                 |                                                             |                                                                                       |
|--------------------------------------|---------------------------------|-------------------------------------------------------------|---------------------------------------------------------------------------------------|
|                                      |                                 | DNA repair, bacterial RecFOR pathway                        | Single-stranded-DNA-specific exonuclease RecJ (EC 3.1.-.-)                            |
|                                      |                                 |                                                             | Single-stranded DNA-binding protein                                                   |
|                                      |                                 |                                                             | Recombination protein RecR                                                            |
|                                      |                                 |                                                             | RecA protein                                                                          |
|                                      |                                 |                                                             | DNA recombination and repair protein RecO                                             |
|                                      |                                 |                                                             | DNA recombination and repair protein RecF                                             |
|                                      |                                 | DNA Repair Base Excision                                    | Endonuclease III (EC 4.2.99.18)                                                       |
|                                      |                                 |                                                             | Single-stranded-DNA-specific exonuclease RecJ (EC 3.1.-.-)                            |
|                                      |                                 |                                                             | Uracil-DNA glycosylase, family 1                                                      |
|                                      |                                 |                                                             | DNA-3-methyladenine glycosylase (EC 3.2.2.20)                                         |
|                                      |                                 |                                                             | DNA polymerase I (EC 2.7.7.7)                                                         |
|                                      |                                 |                                                             | DNA ligase (EC 6.5.1.2)                                                               |
|                                      |                                 | DNA repair, bacterial UvrD and related helicases            | ATP-dependent DNA helicase UvrD/PcrA                                                  |
|                                      | CRISPs                          | CRISPRs                                                     | CRISPR-associated protein, Csn1 family                                                |
|                                      |                                 |                                                             | CRISPR-associated protein Cas1                                                        |
|                                      |                                 |                                                             | CRISPR-associated protein, Csm1 family                                                |
|                                      | DNA Metabolism - no subcategory | Type I Restriction-Modification                             | Type I restriction-modification system, specificity subunit S (EC 3.1.21.3)           |
|                                      |                                 |                                                             | Type I restriction-modification system, restriction subunit R (EC 3.1.21.3)           |
|                                      |                                 |                                                             | Type I restriction-modification system, DNA-methyltransferase subunit M (EC 2.1.1.72) |
|                                      |                                 | Restriction-Modification System                             | Type I restriction-modification system, specificity subunit S (EC 3.1.21.3)           |
|                                      |                                 |                                                             | Type I restriction-modification system, restriction subunit R (EC 3.1.21.3)           |
|                                      |                                 |                                                             | Type I restriction-modification system, DNA-methyltransferase subunit M (EC 2.1.1.72) |
|                                      |                                 | YcfH                                                        | Putative predicted metal-dependent hydrolase                                          |
|                                      |                                 |                                                             | Putative deoxyribonuclease YcfH                                                       |
|                                      |                                 | DNA structural proteins, bacterial                          | Chromosome partition protein smc                                                      |
|                                      |                                 |                                                             | DNA-binding protein HU                                                                |
|                                      | DNA replication                 | DNA topoisomerases, Type I, ATP-independent                 | DNA topoisomerase III (EC 5.99.1.2)                                                   |
|                                      |                                 |                                                             | DNA topoisomerase I (EC 5.99.1.2)                                                     |
|                                      |                                 | DNA topoisomerases, Type II, ATP-dependent                  | DNA gyrase subunit B (EC 5.99.1.3)                                                    |
|                                      |                                 |                                                             | DNA gyrase subunit A (EC 5.99.1.3)                                                    |
|                                      | DNA recombination               | RuvABC plus a hypothetical                                  | FIG000859: hypothetical protein YebC                                                  |
|                                      |                                 |                                                             | Crossover junction endodeoxyribonuclease RuvC (EC 3.1.22.4)                           |
|                                      |                                 |                                                             | Holliday junction DNA helicase RuvA                                                   |
|                                      | DNA uptake, competence          | DNA processing cluster                                      | Holliday junction DNA helicase RuvB                                                   |
|                                      |                                 |                                                             | FIG000557: hypothetical protein co-occurring with RecR                                |
|                                      |                                 |                                                             | Recombination protein RecR                                                            |
|                                      |                                 |                                                             | DNA topoisomerase III (EC 5.99.1.2)                                                   |
|                                      |                                 |                                                             | DNA polymerase III subunits gamma and tau (EC 2.7.7.7)                                |
| Fatty Acids, Lipids, and Isoprenoids | Phospholipids                   | Glycerolipid and Glycerophospholipid Metabolism in Bacteria | Cardiolipin synthesis                                                                 |
|                                      |                                 |                                                             | Cardiolipin synthetase (EC 2.7.8.-)                                                   |
|                                      |                                 |                                                             | Alcohol dehydrogenase (EC 1.1.1.1)                                                    |
|                                      |                                 |                                                             | Acyl-phosphate:glycerol-3-phosphate O-acyltransferase PlsY                            |
|                                      |                                 |                                                             | Phosphatidylglycerophosphatase A (EC 3.1.3.27)                                        |
|                                      |                                 |                                                             | CDP-diacylglycerol--serine O-phosphatidyltransferase (EC 2.7.8.8)                     |
|                                      |                                 |                                                             | Glycerol-3-phosphate dehydrogenase (EC 1.1.5.3)                                       |
|                                      |                                 |                                                             | Glycerol-3-phosphate dehydrogenase [NAD(P)+] (EC 1.1.1.94)                            |
|                                      |                                 |                                                             | Glycerol kinase (EC 2.7.1.30)                                                         |

|                          |                                      |                                    |                                                                                 |
|--------------------------|--------------------------------------|------------------------------------|---------------------------------------------------------------------------------|
|                          |                                      |                                    | Phosphatidylserine decarboxylase (EC 4.1.1.65)                                  |
|                          |                                      |                                    | Aldehyde dehydrogenase (EC 1.2.1.3)                                             |
|                          |                                      |                                    | 1-acyl-sn-glycerol-3-phosphate acyltransferase (EC 2.3.1.51)                    |
|                          |                                      |                                    | Diacylglycerol kinase (EC 2.7.1.107)                                            |
|                          |                                      |                                    | CDP-diacylglycerol--glycerol-3-phosphate 3-phosphatidyltransferase (EC 2.7.8.5) |
|                          |                                      |                                    | Cardiolipin synthetase (EC 2.7.8.-)                                             |
|                          |                                      |                                    | Dihydroxyacetone kinase family protein                                          |
|                          |                                      |                                    | Acyl carrier protein                                                            |
|                          |                                      |                                    | Phosphatidate cytidyltransferase (EC 2.7.7.41)                                  |
|                          |                                      |                                    | Phosphate:acyl-ACP acyltransferase PlsX                                         |
|                          |                                      |                                    | Glycerate kinase (EC 2.7.1.31)                                                  |
| Triacylglycerols         | Triacylglycerol metabolism           |                                    | Monoglyceride lipase (EC 3.1.1.23)                                              |
|                          |                                      |                                    | Lysophospholipase (EC 3.1.1.5)                                                  |
| Fatty acids              | Fatty Acid Biosynthesis FASII        |                                    | 3-oxoacyl-[acyl-carrier protein] reductase (EC 1.1.1.100)                       |
|                          |                                      |                                    | Acetyl-coenzyme A carboxyl transferase alpha chain (EC 6.4.1.2)                 |
|                          |                                      |                                    | Holo-[acyl-carrier protein] synthase (EC 2.7.8.7)                               |
|                          |                                      |                                    | Biotin carboxyl carrier protein of acetyl-CoA carboxylase                       |
|                          |                                      |                                    | Biotin carboxylase of acetyl-CoA carboxylase (EC 6.3.4.14)                      |
|                          |                                      |                                    | Acetyl-coenzyme A carboxyl transferase beta chain (EC 6.4.1.2)                  |
|                          |                                      |                                    | Acyl carrier protein                                                            |
|                          |                                      |                                    | Malonyl CoA-acyl carrier protein transacylase (EC 2.3.1.39)                     |
|                          |                                      |                                    | 3-hydroxyacyl-[acyl-carrier-protein] dehydratase, FabZ form (EC 4.2.1.59)       |
|                          |                                      |                                    | Enoyl-[acyl-carrier-protein] reductase [FMN] (EC 1.3.1.9)                       |
| Isoprenoids              | Isoprenoinds for Quinones            |                                    | Undecaprenyl diphosphate synthase (EC 2.5.1.31)                                 |
|                          |                                      |                                    | Heptaprenyl diphosphate synthase component I (EC 2.5.1.30)                      |
|                          |                                      |                                    | 1-deoxy-D-xylulose 5-phosphate reductoisomerase (EC 1.1.1.267)                  |
|                          | Isoprenoid Biosynthesis              |                                    | Undecaprenyl diphosphate synthase (EC 2.5.1.31)                                 |
|                          |                                      |                                    | 4-hydroxy-3-methylbut-2-enyl diphosphate reductase (EC 1.17.1.2)                |
|                          |                                      |                                    | 1-hydroxy-2-methyl-2-(E)-butenyl 4-diphosphate synthase (EC 1.17.7.1)           |
|                          |                                      |                                    | 4-diphosphocytidyl-2-C-methyl-D-erythritol kinase (EC 2.7.1.148)                |
|                          |                                      |                                    | 2-C-methyl-D-erythritol 2,4-cyclodiphosphate synthase (EC 4.6.1.12)             |
|                          |                                      |                                    | 2-C-methyl-D-erythritol 4-phosphate cytidyltransferase (EC 2.7.7.60)            |
|                          |                                      |                                    | 1-deoxy-D-xylulose 5-phosphate synthase (EC 2.2.1.7)                            |
|                          |                                      |                                    | 1-deoxy-D-xylulose 5-phosphate reductoisomerase (EC 1.1.1.267)                  |
|                          |                                      |                                    | 4-hydroxy-3-methylbut-2-enyl diphosphate reductase (EC 1.17.1.2)                |
|                          |                                      |                                    | 1-hydroxy-2-methyl-2-(E)-butenyl 4-diphosphate synthase (EC 1.17.7.1)           |
|                          |                                      |                                    | 4-diphosphocytidyl-2-C-methyl-D-erythritol kinase (EC 2.7.1.148)                |
|                          |                                      |                                    | 2-C-methyl-D-erythritol 2,4-cyclodiphosphate synthase (EC 4.6.1.12)             |
|                          |                                      |                                    | 2-C-methyl-D-erythritol 4-phosphate cytidyltransferase (EC 2.7.7.60)            |
|                          |                                      |                                    | 1-deoxy-D-xylulose 5-phosphate synthase (EC 2.2.1.7)                            |
| Nitrogen Metabolism      | Nitrogen Metabolism - no subcategory | Nitrosative stress                 | Hydroxylamine reductase (EC 1.7.-.-)                                            |
|                          |                                      | Nitrate and nitrite ammonification | Nitrite reductase probable electron transfer 4Fe-S subunit (EC 1.7.1.4)         |
|                          |                                      |                                    | Assimilatory nitrate reductase large subunit (EC:1.7.99.4)                      |
|                          |                                      |                                    | Nitrite reductase probable [NAD(P)H] subunit (EC 1.7.1.4)                       |
| Dormancy and Sporulation | Spore Core Dehydration               |                                    | Spore maturation protein B                                                      |
|                          |                                      |                                    | Spore maturation protein A                                                      |

|                 | Dormancy and Sporulation - no subcategory | Sporulation-associated proteins with broader functions                                             | Protein of unknown function identified by role in sporulation (SpoVG)                |  |
|-----------------|-------------------------------------------|----------------------------------------------------------------------------------------------------|--------------------------------------------------------------------------------------|--|
|                 |                                           |                                                                                                    | Peptidyl-tRNA hydrolase (EC 3.1.1.29)                                                |  |
| Respiration     | Electron accepting reactions              | Anaerobic respiratory reductases                                                                   | RNA polymerase sporulation specific sigma factor SigH                                |  |
|                 |                                           |                                                                                                    | Anaerobic sulfite reductase subunit C (EC 1.8.1.-)                                   |  |
|                 |                                           |                                                                                                    | Anaerobic sulfite reductase subunit A                                                |  |
|                 |                                           |                                                                                                    | Arsenate reductase (EC 1.20.4.1)                                                     |  |
|                 |                                           |                                                                                                    | Anaerobic sulfite reductase subunit B                                                |  |
|                 |                                           | Na(+)-translocating NADH-quinone oxidoreductase and rnf-like group of electron transport complexes | Anaerobic dehydrogenases, typically selenocysteine-containing                        |  |
|                 |                                           |                                                                                                    | Electron transport complex protein RnfE                                              |  |
|                 |                                           |                                                                                                    | Electron transport complex protein RnfA                                              |  |
|                 |                                           |                                                                                                    | Electron transport complex protein RnfG                                              |  |
|                 |                                           |                                                                                                    | Electron transport complex protein RnfD                                              |  |
|                 | Respiration - no subcategory              | Respiratory dehydrogenases 1                                                                       | Electron transport complex protein RnfB                                              |  |
|                 |                                           |                                                                                                    | Electron transport complex protein RnfC                                              |  |
|                 |                                           |                                                                                                    | Glycerol dehydrogenase (EC 1.1.1.6)                                                  |  |
|                 |                                           |                                                                                                    | NADH dehydrogenase (EC 1.6.99.3)                                                     |  |
|                 |                                           |                                                                                                    | Glycerol-3-phosphate dehydrogenase (EC 1.1.5.3)                                      |  |
|                 |                                           | Succinate dehydrogenase                                                                            | L-lactate dehydrogenase (EC 1.1.2.3)                                                 |  |
|                 |                                           |                                                                                                    | Fumarate reductase flavoprotein subunit (EC 1.3.99.1)                                |  |
|                 |                                           |                                                                                                    | Biogenesis of c-type cytochromes                                                     |  |
|                 |                                           |                                                                                                    | Cytochrome c-type biogenesis protein ResA                                            |  |
|                 |                                           |                                                                                                    | Cytochrome c-type biogenesis protein CcdA (DsbD analog)                              |  |
| Stress Response | Osmotic stress                            | Soluble cytochromes and functionally related electron carriers                                     | Ferredoxin                                                                           |  |
|                 |                                           |                                                                                                    | Aquaporin Z                                                                          |  |
|                 |                                           | Osmoregulation                                                                                     | Glycerol uptake facilitator protein                                                  |  |
|                 |                                           |                                                                                                    | L-proline glycine betaine ABC transport system permease protein ProV (TC 3.A.1.12.1) |  |
|                 |                                           | Choline and Betaine Uptake and Betaine Biosynthesis                                                | Glycine betaine transporter OpuD                                                     |  |
|                 |                                           |                                                                                                    | Sarcosine oxidase alpha subunit (EC 1.5.3.1)                                         |  |
|                 |                                           |                                                                                                    | L-proline glycine betaine binding ABC transporter protein ProX (TC 3.A.1.12.1)       |  |
|                 |                                           |                                                                                                    | Rubrerythrin                                                                         |  |
|                 | Oxidative stress                          | Oxidative stress                                                                                   | Ferric uptake regulation protein                                                     |  |
|                 |                                           |                                                                                                    | transcriptional regulator, Crp/Fnr family                                            |  |
|                 |                                           |                                                                                                    | Superoxide reductase (EC 1.15.1.2)                                                   |  |
|                 |                                           |                                                                                                    | Fe2+/Zn2+ uptake regulation proteins                                                 |  |
|                 |                                           |                                                                                                    | Peroxide stress regulator                                                            |  |
|                 |                                           |                                                                                                    | Redox-sensitive transcriptional regulator (AT-rich DNA-binding protein)              |  |
|                 |                                           | Glutathione: Biosynthesis and gamma-glutamyl cycle                                                 | Glutathione biosynthesis bifunctional protein gshF (EC 6.3.2.2)(EC 6.3.2.3)          |  |
|                 |                                           |                                                                                                    | Lactoylglutathione lyase (EC 4.4.1.5)                                                |  |
|                 | Oxidative stress                          | Glutathione: Non-redox reactions                                                                   | Hydroxyacylglutathione hydrolase (EC 3.1.2.6)                                        |  |
|                 |                                           |                                                                                                    | Rubrerythrin                                                                         |  |
|                 |                                           | Rubrerythrin                                                                                       | Rubredoxin                                                                           |  |
|                 |                                           |                                                                                                    | Superoxide reductase (EC 1.15.1.2)                                                   |  |
|                 |                                           | Redox-dependent regulation of nucleus processes                                                    | Nicotinate phosphoribosyltransferase (EC 2.4.2.11)                                   |  |
|                 |                                           |                                                                                                    | Nicotinamidase (EC 3.5.1.19)                                                         |  |
|                 |                                           |                                                                                                    | NAD-dependent protein deacetylase of SIR2 family                                     |  |
|                 |                                           |                                                                                                    | NAD-dependent glyceraldehyde-3-phosphate dehydrogenase (EC 1.2.1.12)                 |  |
|                 |                                           | Glutathione: Redox cycle                                                                           | Glutaredoxin                                                                         |  |



| Glutaredoxins                    |                                                                   | Glutaredoxin                                                                                           |
|----------------------------------|-------------------------------------------------------------------|--------------------------------------------------------------------------------------------------------|
| Cold shock                       | Cold shock, CspA family of proteins                               | Cold shock protein CspA                                                                                |
| Heat shock                       | Heat shock dnaK gene cluster extended                             | Hypothetical radical SAM family enzyme, NOT coproporphyrinogen III oxidase, oxygen-independent         |
|                                  |                                                                   | Hypothetical radical SAM family enzyme in heat shock gene cluster, similarity with CPO of BS HemN-type |
|                                  |                                                                   | Heat-inducible transcription repressor HrcA                                                            |
|                                  |                                                                   | Chaperone protein DnaK                                                                                 |
|                                  |                                                                   | tRNA-t(6)A37 methylthiotransferase                                                                     |
|                                  |                                                                   | Chaperone protein DnaJ                                                                                 |
|                                  |                                                                   | Ribosomal RNA small subunit methyltransferase E (EC 2.1.1.-)                                           |
|                                  |                                                                   | tmRNA-binding protein SmpB                                                                             |
|                                  |                                                                   | Heat shock protein GrpE                                                                                |
|                                  |                                                                   | Translation elongation factor LepA                                                                     |
|                                  |                                                                   | Nucleoside 5-triphosphatase RdgB (dHATP, dITP, XTP-specific) (EC 3.6.1.15)                             |
|                                  |                                                                   | Ribosomal protein L11 methyltransferase (EC 2.1.1.-)                                                   |
|                                  |                                                                   | Signal peptidase-like protein                                                                          |
|                                  |                                                                   | FIG009886: phosphoesterase                                                                             |
| Stress Response - no subcategory | SigmaB stress response regulation                                 | Ribonuclease PH (EC 2.7.7.56)                                                                          |
|                                  |                                                                   | rRNA small subunit methyltransferase I                                                                 |
|                                  |                                                                   | Serine phosphatase RsbU, regulator of sigma subunit                                                    |
| Periplasmic Stress               | Periplasmic Stress Response                                       | GTP-binding protein HflX                                                                               |
|                                  |                                                                   | Carbon starvation protein A                                                                            |
|                                  |                                                                   | Survival protein SurA precursor (Peptidyl-prolyl cis-trans isomerase SurA) (EC 5.2.1.8)                |
| Metabolism of Aromatic Compounds | Peripheral pathways for catabolism of aromatic compounds          | Outer membrane protein H precursor                                                                     |
|                                  |                                                                   | 3-dehydroquinate dehydratase II (EC 4.2.1.10)                                                          |
| Amino Acids and Derivatives      | Glutamine, glutamate, aspartate, asparagine; ammonia assimilation | L-asparaginase I, cytoplasmic (EC 3.5.1.1)                                                             |
|                                  |                                                                   | L-asparaginase (EC 3.5.1.1)                                                                            |
|                                  |                                                                   | Aspartate--ammonia ligase (EC 6.3.1.1)                                                                 |
|                                  |                                                                   | Aspartate aminotransferase (EC 2.6.1.1)                                                                |
|                                  |                                                                   | Glutamate racemase (EC 5.1.1.3)                                                                        |
|                                  |                                                                   | Glutaminase (EC 3.5.1.2)                                                                               |
|                                  |                                                                   | Glutamate synthase [NADPH] small chain (EC 1.4.1.13)                                                   |
|                                  |                                                                   | Glutamine synthetase type III, GlnN (EC 6.3.1.2)                                                       |
|                                  |                                                                   | Aspartate ammonia-lyase (EC 4.3.1.1)                                                                   |
|                                  |                                                                   | Glutamine synthetases                                                                                  |
|                                  | Histidine Metabolism                                              | Glutamine synthetase type III, GlnN (EC 6.3.1.2)                                                       |
|                                  |                                                                   | N-formylglutamate deformylase (EC 3.5.1.68)                                                            |
|                                  |                                                                   | Formiminoglutamase (EC 3.5.3.8)                                                                        |
|                                  |                                                                   | Imidazolonepropionase (EC 3.5.2.7)                                                                     |
|                                  |                                                                   | Urocanate hydratase (EC 4.2.1.49)                                                                      |
|                                  | Histidine Degradation                                             | Histidine ammonia-lyase (EC 4.3.1.3)                                                                   |
|                                  |                                                                   | Glutamate formiminotransferase (EC 2.1.2.5)                                                            |
|                                  |                                                                   | Urease accessory protein UreD                                                                          |
|                                  |                                                                   | Urease accessory protein UreF                                                                          |
|                                  | Arginine; urea cycle, polyamines                                  | Urease beta subunit (EC 3.5.1.5)                                                                       |
|                                  |                                                                   | Urease accessory protein UreG                                                                          |
|                                  |                                                                   | Urea channel UreI                                                                                      |
|                                  |                                                                   | Urease gamma subunit (EC 3.5.1.5)                                                                      |
|                                  |                                                                   | Urease alpha subunit (EC 3.5.1.5)                                                                      |

|                                             |                                                                                               |
|---------------------------------------------|-----------------------------------------------------------------------------------------------|
| Polyamine Metabolism                        | Arginine/ornithine antiporter ArcD                                                            |
|                                             | Spermidine Putrescine ABC transporter permease component potC (TC 3.A.1.11.1)                 |
|                                             | Spermidine Putrescine ABC transporter permease component PotB (TC 3.A.1.11.1)                 |
|                                             | Arginine decarboxylase, catabolic (EC 4.1.1.19)                                               |
|                                             | Putrescine transport ATP-binding protein PotA (TC 3.A.1.11.1)                                 |
|                                             | Agmatine deiminase (EC 3.5.3.12)                                                              |
|                                             | Arginine decarboxylase (EC 4.1.1.19)                                                          |
|                                             | Ornithine decarboxylase (EC 4.1.1.17)                                                         |
|                                             | N-carbamoylputrescine amidase (3.5.1.53)                                                      |
|                                             | 5'-methylthioadenosine nucleosidase (EC 3.2.2.16)                                             |
| Arginine and Ornithine Degradation          | ABC transporter, periplasmic spermidine putrescine-binding protein PotD (TC 3.A.1.11.1)       |
|                                             | Arginine/ornithine antiporter ArcD                                                            |
|                                             | Arginine decarboxylase, catabolic (EC 4.1.1.19)                                               |
|                                             | Arginine decarboxylase (EC 4.1.1.19)                                                          |
|                                             | Agmatine deiminase (EC 3.5.3.12)                                                              |
|                                             | Ornithine decarboxylase (EC 4.1.1.17)                                                         |
|                                             | Lysine-arginine-ornithine-binding periplasmic protein precursor (TC 3.A.1.3.1)                |
| Urea decomposition                          | N-carbamoylputrescine amidase (3.5.1.53)                                                      |
|                                             | Urease accessory protein UreD                                                                 |
|                                             | Urease accessory protein UreF                                                                 |
|                                             | Urease beta subunit (EC 3.5.1.5)                                                              |
|                                             | Urease accessory protein UreG                                                                 |
|                                             | Urea channel UreI                                                                             |
|                                             | Urease gamma subunit (EC 3.5.1.5)                                                             |
| Methionine Degradation                      | Urease alpha subunit (EC 3.5.1.5)                                                             |
|                                             | S-adenosylhomocysteine nucleosidase (EC 3.2.2.9)                                              |
|                                             | Pyruvate-flavodoxin oxidoreductase (EC 1.2.7.-)                                               |
|                                             | Methionine ABC transporter substrate-binding protein                                          |
|                                             | Methionine ABC transporter ATP-binding protein                                                |
|                                             | Methionine ABC transporter permease protein                                                   |
|                                             | S-adenosylmethionine synthetase (EC 2.5.1.6)                                                  |
|                                             | Methionine transporter MetT                                                                   |
|                                             | Adenosylhomocysteinase (EC 3.3.1.1)                                                           |
|                                             | Methionine ABC transporter ATP-binding protein                                                |
| Lysine, threonine, methionine, and cysteine | Duplicated ATPase component MtsB of energizing module of methionine-regulated ECF transporter |
|                                             | S-adenosylmethionine synthetase (EC 2.5.1.6)                                                  |
|                                             | O-succinylhomoserine sulfhydrylase (EC 2.5.1.48)                                              |
|                                             | Serine acetyltransferase (EC 2.3.1.30)                                                        |
|                                             | Homoserine O-succinyltransferase (EC 2.3.1.46)                                                |
|                                             | 5-methyltetrahydrofolate--homocysteine methyltransferase (EC 2.1.1.13)                        |
|                                             | O-acetylhomoserine sulfhydrylase (EC 2.5.1.49)                                                |
|                                             | Transmembrane component MtsC of energizing module of methionine-regulated ECF transporter     |
|                                             | 5,10-methylenetetrahydrofolate reductase (EC 1.5.1.20)                                        |
|                                             | Homoserine dehydrogenase (EC 1.1.1.3)                                                         |
|                                             | Methionine ABC transporter substrate-binding protein                                          |
|                                             | S-adenosylhomocysteine nucleosidase (EC 3.2.2.9)                                              |
|                                             | Methionine ABC transporter permease protein                                                   |
|                                             | Methionine transporter MetT                                                                   |
|                                             | Adenosylhomocysteinase (EC 3.3.1.1)                                                           |

|                                              |                                                                                                                | Substrate-specific component MtsA of methionine-regulated ECF transporter        |
|----------------------------------------------|----------------------------------------------------------------------------------------------------------------|----------------------------------------------------------------------------------|
| Threonine and Homoserine Biosynthesis        |                                                                                                                | Homoserine dehydrogenase (EC 1.1.1.3)                                            |
|                                              |                                                                                                                | Aspartate-semialdehyde dehydrogenase (EC 1.2.1.11)                               |
|                                              |                                                                                                                | Aspartate aminotransferase (EC 2.6.1.1)                                          |
|                                              |                                                                                                                | Aspartokinase (EC 2.7.2.4)                                                       |
| Threonine degradation                        |                                                                                                                | Threonine dehydratase (EC 4.3.1.19)                                              |
| Lysine Biosynthesis DAP Pathway, GJO scratch |                                                                                                                | Diaminopimelate decarboxylase (EC 4.1.1.20)                                      |
|                                              |                                                                                                                | N-acetyl-L,L-diaminopimelate deacetylase (EC 3.5.1.47)                           |
|                                              |                                                                                                                | Diaminopimelate epimerase (EC 5.1.1.7)                                           |
|                                              |                                                                                                                | Aspartate-semialdehyde dehydrogenase (EC 1.2.1.11)                               |
|                                              |                                                                                                                | 2,3,4,5-tetrahydropyridine-2,6-dicarboxylate N-acetyltransferase (EC 2.3.1.89)   |
|                                              |                                                                                                                | 4-hydroxy-tetrahydrodipicolinate reductase (EC 1.17.1.8)                         |
|                                              |                                                                                                                | Aspartokinase (EC 2.7.2.4)                                                       |
| Lysine degradation                           |                                                                                                                | 4-hydroxy-tetrahydrodipicolinate synthase (EC 4.3.3.7)                           |
|                                              |                                                                                                                | Lysine decarboxylase (EC 4.1.1.18)                                               |
| Lysine Biosynthesis DAP Pathway              |                                                                                                                | Diaminopimelate decarboxylase (EC 4.1.1.20)                                      |
|                                              |                                                                                                                | N-acetyl-L,L-diaminopimelate deacetylase (EC 3.5.1.47)                           |
|                                              |                                                                                                                | Diaminopimelate epimerase (EC 5.1.1.7)                                           |
|                                              |                                                                                                                | Aspartate-semialdehyde dehydrogenase (EC 1.2.1.11)                               |
|                                              |                                                                                                                | 2,3,4,5-tetrahydropyridine-2,6-dicarboxylate N-acetyltransferase (EC 2.3.1.89)   |
|                                              |                                                                                                                | 4-hydroxy-tetrahydrodipicolinate reductase (EC 1.17.1.8)                         |
|                                              |                                                                                                                | Aspartokinase (EC 2.7.2.4)                                                       |
| Amino Acids and Derivatives - no subcategory | Creatine and Creatinine Degradation                                                                            | 4-hydroxy-tetrahydrodipicolinate synthase (EC 4.3.3.7)                           |
|                                              |                                                                                                                | Cytosine permease                                                                |
| Branched-chain amino acids                   | Branched-Chain Amino Acid Biosynthesis                                                                         | Cytosine deaminase (EC 3.5.4.1)                                                  |
|                                              |                                                                                                                | Branched-chain amino acid aminotransferase (EC 2.6.1.42)                         |
|                                              |                                                                                                                | Threonine dehydratase (EC 4.3.1.19)                                              |
|                                              |                                                                                                                | Ketol-acid reductoisomerase (EC 1.1.1.86)                                        |
|                                              |                                                                                                                | Dihydroxy-acid dehydratase (EC 4.2.1.9)                                          |
|                                              |                                                                                                                | Acetolactate synthase large subunit (EC 2.2.1.6)                                 |
| Aromatic amino acids and derivatives         | Common Pathway For Synthesis of Aromatic Compounds (DAHP synthase to chorismate)                               | Acetolactate synthase small subunit (EC 2.2.1.6)                                 |
|                                              |                                                                                                                | Shikimate kinase I (EC 2.7.1.71)                                                 |
|                                              |                                                                                                                | 5-Enolpyruvylshikimate-3-phosphate synthase (EC 2.5.1.19)                        |
|                                              |                                                                                                                | Shikimate 5-dehydrogenase I alpha (EC 1.1.1.25)                                  |
|                                              |                                                                                                                | 3-dehydroquinate dehydratase II (EC 4.2.1.10)                                    |
|                                              |                                                                                                                | 2-keto-3-deoxy-D-arabino-heptulosonate-7-phosphate synthase I beta (EC 2.5.1.54) |
|                                              |                                                                                                                | 3-dehydroquinate synthase (EC 4.2.3.4)                                           |
|                                              | Chorismate Synthesis                                                                                           | Chorismate synthase (EC 4.2.3.5)                                                 |
|                                              |                                                                                                                | Shikimate kinase I (EC 2.7.1.71)                                                 |
|                                              |                                                                                                                | 5-Enolpyruvylshikimate-3-phosphate synthase (EC 2.5.1.19)                        |
|                                              |                                                                                                                | Shikimate 5-dehydrogenase I alpha (EC 1.1.1.25)                                  |
|                                              |                                                                                                                | 3-dehydroquinate dehydratase II (EC 4.2.1.10)                                    |
|                                              |                                                                                                                | 2-keto-3-deoxy-D-arabino-heptulosonate-7-phosphate synthase I beta (EC 2.5.1.54) |
|                                              |                                                                                                                | 3-dehydroquinate synthase (EC 4.2.3.4)                                           |
|                                              |                                                                                                                | Chorismate synthase (EC 4.2.3.5)                                                 |
|                                              | Chorismate: Intermediate for synthesis of Tryptophan, PABA antibiotics, PABA, 3-hydroxy-anthranilate and more. | Para-aminobenzoate synthase, amidotransferase component (EC 2.6.1.85)            |
|                                              |                                                                                                                | Isochorismatase (EC 3.3.2.1)                                                     |

|                       |                                        |                                                                |                                                                                                                                 |
|-----------------------|----------------------------------------|----------------------------------------------------------------|---------------------------------------------------------------------------------------------------------------------------------|
| Sulfur Metabolism     | Sulfur Metabolism - no subcategory     | Phenylalanine and Tyrosine Branches from Chorismate            | Cyclohexadienyl dehydratase (EC 4.2.1.51)(EC 4.2.1.91)<br>Biosynthetic Aromatic amino acid aminotransferase alpha (EC 2.6.1.57) |
|                       |                                        | Proline Synthesis                                              | Pyrroline-5-carboxylate reductase (EC 1.5.1.2)                                                                                  |
|                       |                                        | A Hypothetical Protein Related to Proline Metabolism           | Hypothetical protein YggS, proline synthase co-transcribed bacterial homolog PROSC                                              |
|                       |                                        | Glycine Biosynthesis                                           | Pyrroline-5-carboxylate reductase (EC 1.5.1.2)<br>Serine hydroxymethyltransferase (EC 2.1.2.1)                                  |
|                       |                                        | Alanine, serine, and glycine                                   | Branched-chain amino acid aminotransferase (EC 2.6.1.42)                                                                        |
|                       |                                        |                                                                | Cysteine desulfurase (EC 2.8.1.7)                                                                                               |
|                       |                                        |                                                                | Alanine racemase (EC 5.1.1.1)                                                                                                   |
|                       |                                        |                                                                | Phosphoserine phosphatase (EC 3.1.3.3)                                                                                          |
|                       |                                        |                                                                | Serine hydroxymethyltransferase (EC 2.1.2.1)                                                                                    |
|                       |                                        | Thioredoxin-disulfide reductase                                | Thiol peroxidase, Tpx-type (EC 1.11.1.15)                                                                                       |
|                       |                                        |                                                                | Alkyl hydroperoxide reductase protein F (EC 1.6.4.-)                                                                            |
|                       |                                        |                                                                | Alkyl hydroperoxide reductase protein C (EC 1.6.4.-)                                                                            |
|                       |                                        |                                                                | Thioredoxin reductase (EC 1.8.1.9)                                                                                              |
|                       |                                        |                                                                | Alpha-galactosidase (EC 3.2.1.22)                                                                                               |
|                       |                                        |                                                                | Beta-galactosidase (EC 3.2.1.23)                                                                                                |
|                       |                                        | Galactosylceramide and Sulfatide metabolism                    | probable beta-D-galactosidase                                                                                                   |
| Phosphorus Metabolism | Phosphorus Metabolism - no subcategory | High affinity phosphate transporter and control of PHO regulon | Phosphate regulon transcriptional regulatory protein PhoB (SphR)                                                                |
|                       |                                        |                                                                | Phosphate transport system permease protein PstC (TC 3.A.1.7.1)                                                                 |
|                       |                                        |                                                                | Phosphate transport ATP-binding protein PstB (TC 3.A.1.7.1)                                                                     |
|                       |                                        |                                                                | Phosphate transport system permease protein PstA (TC 3.A.1.7.1)                                                                 |
|                       |                                        |                                                                | Phosphate transport system regulatory protein PhoU                                                                              |
|                       |                                        |                                                                | Phosphate ABC transporter, periplasmic phosphate-binding protein PstS (TC 3.A.1.7.1)                                            |
|                       |                                        |                                                                | Polyphosphate kinase (EC 2.7.4.1)                                                                                               |
|                       |                                        |                                                                | Phosphate regulon sensor protein PhoR (SphS) (EC 2.7.13.3)                                                                      |
|                       |                                        |                                                                | Phosphate regulon transcriptional regulatory protein PhoB (SphR)                                                                |
|                       |                                        |                                                                | Phosphate transport system permease protein PstC (TC 3.A.1.7.1)                                                                 |
|                       |                                        | Phosphate metabolism                                           | Phosphate transport ATP-binding protein PstB (TC 3.A.1.7.1)                                                                     |
|                       |                                        |                                                                | Manganese-dependent inorganic pyrophosphatase (EC 3.6.1.1)                                                                      |
|                       |                                        |                                                                | Phosphate transport system permease protein PstA (TC 3.A.1.7.1)                                                                 |
|                       |                                        |                                                                | Exopolyphosphatase (EC 3.6.1.11)                                                                                                |
|                       |                                        |                                                                | Phosphate transport system regulatory protein PhoU                                                                              |
|                       |                                        |                                                                | Predicted ATPase related to phosphate starvation-inducible protein PhoH                                                         |
|                       |                                        |                                                                | Phosphate ABC transporter, periplasmic phosphate-binding protein PstS (TC 3.A.1.7.1)                                            |
|                       |                                        |                                                                | Alkaline phosphatase (EC 3.1.3.1)                                                                                               |
|                       |                                        |                                                                | Alkaline phosphatase like protein                                                                                               |
|                       |                                        |                                                                | Polyphosphate kinase (EC 2.7.4.1)                                                                                               |
|                       |                                        |                                                                | Sodium-dependent phosphate transporter                                                                                          |
|                       |                                        |                                                                | Phosphate regulon sensor protein PhoR (SphS) (EC 2.7.13.3)                                                                      |
|                       |                                        | Polyphosphate                                                  | Polyphosphate kinase (EC 2.7.4.1)                                                                                               |
|                       |                                        |                                                                | Exopolyphosphatase (EC 3.6.1.11)                                                                                                |
| Carbohydrates         | Central carbohydrate metabolism        | Methylglyoxal Metabolism                                       | Methylglyoxal synthase (EC 4.2.3.3)                                                                                             |
|                       |                                        |                                                                | Lactoylglutathione lyase (EC 4.4.1.5)                                                                                           |
|                       |                                        |                                                                | Aldehyde dehydrogenase (EC 1.2.1.3)                                                                                             |
|                       |                                        | Pyruvate:ferredoxin oxidoreductase                             | Hydroxyacylglutathione hydrolase (EC 3.1.2.6)                                                                                   |
|                       |                                        |                                                                | Pyruvate:ferredoxin oxidoreductase, delta subunit (EC 1.2.7.1)                                                                  |
|                       |                                        |                                                                | Pyruvate:ferredoxin oxidoreductase, alpha subunit (EC 1.2.7.1)                                                                  |
|                       |                                        |                                                                | Pyruvate-flavodoxin oxidoreductase (EC 1.2.7.-)                                                                                 |
|                       |                                        |                                                                | Pyruvate:ferredoxin oxidoreductase, beta subunit (EC 1.2.7.1)                                                                   |
|                       |                                        |                                                                | Pyruvate:ferredoxin oxidoreductase, gamma subunit (EC 1.2.7.1)                                                                  |
|                       |                                        |                                                                |                                                                                                                                 |

|                                                                |                                                                                                               |
|----------------------------------------------------------------|---------------------------------------------------------------------------------------------------------------|
| Pyruvate metabolism II: acetyl-CoA, acetogenesis from pyruvate | Aldehyde dehydrogenase (EC 1.2.1.3)                                                                           |
|                                                                | Acetaldehyde dehydrogenase (EC 1.2.1.10)                                                                      |
|                                                                | Phosphate acetyltransferase (EC 2.3.1.8)                                                                      |
|                                                                | Acetate kinase (EC 2.7.2.1)                                                                                   |
|                                                                | NAD-dependent protein deacetylase of SIR2 family                                                              |
| Pyruvate Alanine Serine Interconversions                       | Acylphosphate phosphohydrolase (EC 3.6.1.7), putative                                                         |
|                                                                | Branched-chain amino acid aminotransferase (EC 2.6.1.42)                                                      |
|                                                                | L-serine dehydratase (EC 4.3.1.17)                                                                            |
| Dihydroxyacetone kinases                                       | Alanine racemase (EC 5.1.1.1)                                                                                 |
|                                                                | Phosphoenolpyruvate-dihydroxyacetone phosphotransferase (EC 2.7.1.121), subunit DhaM                          |
|                                                                | DHA-specific IIA component                                                                                    |
|                                                                | Phosphoenolpyruvate-dihydroxyacetone phosphotransferase (EC 2.7.1.121), ADP-binding subunit DhaL              |
|                                                                | Phosphoenolpyruvate-dihydroxyacetone phosphotransferase (EC 2.7.1.121), dihydroxyacetone binding subunit DhaK |
| Glycolysis and Gluconeogenesis                                 | 6-phosphofructokinase (EC 2.7.1.11)                                                                           |
|                                                                | Triosephosphate isomerase (EC 5.3.1.1)                                                                        |
|                                                                | Fructose-1,6-bisphosphatase, GlpX type (EC 3.1.3.11)                                                          |
|                                                                | Fructose-bisphosphate aldolase class II (EC 4.1.2.13)                                                         |
|                                                                | 2,3-bisphosphoglycerate-independent phosphoglycerate mutase (EC 5.4.2.1)                                      |
|                                                                | Glucose-6-phosphate isomerase (EC 5.3.1.9)                                                                    |
|                                                                | Pyruvate kinase (EC 2.7.1.40)                                                                                 |
|                                                                | Enolase (EC 4.2.1.11)                                                                                         |
| Pentose phosphate pathway                                      | NAD-dependent glyceraldehyde-3-phosphate dehydrogenase (EC 1.2.1.12)                                          |
|                                                                | Phosphoglycerate kinase (EC 2.7.2.3)                                                                          |
|                                                                | Transketolase, N-terminal section (EC 2.2.1.1)                                                                |
|                                                                | Ribose-phosphate pyrophosphokinase (EC 2.7.6.1)                                                               |
|                                                                | 6-phosphogluconolactonase (EC 3.1.1.31), eukaryotic type                                                      |
|                                                                | Transaldolase (EC 2.2.1.2)                                                                                    |
|                                                                | Ribose 5-phosphate isomerase B (EC 5.3.1.6)                                                                   |
|                                                                | Transketolase, C-terminal section (EC 2.2.1.1)                                                                |
| Pyruvate metabolism I: anaplerotic reactions, PEP              | Ribulose-phosphate 3-epimerase (EC 5.1.3.1)                                                                   |
|                                                                | Oxaloacetate decarboxylase beta chain (EC 4.1.1.3)                                                            |
|                                                                | Phosphoenolpyruvate carboxykinase [ATP] (EC 4.1.1.49)                                                         |
|                                                                | NADP-dependent malic enzyme (EC 1.1.1.40)                                                                     |
| Aminosugars                                                    | Pyruvate kinase (EC 2.7.1.40)                                                                                 |
|                                                                | Malate permease                                                                                               |
|                                                                | PTS system, N-acetylglucosamine-specific IIB component (EC 2.7.1.69)                                          |
|                                                                | Glucosamine-6-phosphate deaminase (EC 3.5.99.6)                                                               |
|                                                                | N-Acetyl-D-glucosamine ABC transport system, permease protein 2                                               |
| Chitin and N-acetylglucosamine utilization                     | Chitinase (EC 3.2.1.14)                                                                                       |
|                                                                | N-acetylglucosamine-6-phosphate deacetylase (EC 3.5.1.25)                                                     |
|                                                                | Sucrose operon repressor ScrR, LacI family                                                                    |
|                                                                | PTS system, sucrose-specific IIC component (EC 2.7.1.69)                                                      |
|                                                                | PTS system, sucrose-specific IIB component (EC 2.7.1.69)                                                      |
| Sucrose utilization                                            | Fructokinase (EC 2.7.1.4)                                                                                     |
|                                                                | 4-alpha-glucanotransferase (amylomaltase) (EC 2.4.1.25)                                                       |
|                                                                | Maltose/maltodextrin ABC transporter, permease protein MalF                                                   |
|                                                                | Maltose-6'-phosphate glucosidase (EC 3.2.1.122)                                                               |
|                                                                | Neopullulanase (EC 3.2.1.135)                                                                                 |
| Di- and oligosaccharides                                       | Glycogen phosphorylase (EC 2.4.1.1)                                                                           |
|                                                                | Alpha-glucosidase (EC 3.2.1.20)                                                                               |
|                                                                | Aldose 1-epimerase (EC 5.1.3.3)                                                                               |
|                                                                | Maltose and Maltodextrin Utilization                                                                          |

|                                              |                                               |                                                                                                                |
|----------------------------------------------|-----------------------------------------------|----------------------------------------------------------------------------------------------------------------|
|                                              |                                               | PTS system, maltose and glucose-specific IIC component (EC 2.7.1.69)                                           |
|                                              |                                               | Multiple sugar ABC transporter, ATP-binding protein                                                            |
|                                              |                                               | Maltose/maltodextrin transport ATP-binding protein MalK (EC 3.6.3.19)                                          |
|                                              |                                               | PTS system, maltose and glucose-specific IIB component (EC 2.7.1.69)                                           |
|                                              |                                               | Maltoporin (maltose/maltodextrin high-affinity receptor, phage lambda receptor protein)                        |
|                                              |                                               | Maltose/maltodextrin ABC transporter, permease protein MalG                                                    |
|                                              |                                               | PTS system, cellobiose-specific IIB component (EC 2.7.1.69)                                                    |
|                                              |                                               | Outer surface protein of unknown function, cellobiose operon                                                   |
|                                              |                                               | 6-phospho-beta-glucosidase (EC 3.2.1.86)                                                                       |
|                                              |                                               | PTS system, cellobiose-specific IIC component (EC 2.7.1.69)                                                    |
| Beta-Glucoside Metabolism                    |                                               | PTS system, cellobiose-specific IIA component (EC 2.7.1.69)                                                    |
|                                              |                                               | Beta-glucosidase (EC 3.2.1.21)                                                                                 |
|                                              |                                               | UDP-glucose 4-epimerase (EC 5.1.3.2)                                                                           |
|                                              |                                               | Galactose/methyl galactoside ABC transport system, permease protein MglC (TC 3.A.1.2.3)                        |
|                                              |                                               | Alpha-galactosidase (EC 3.2.1.22)                                                                              |
|                                              |                                               | Galactokinase (EC 2.7.1.6)                                                                                     |
|                                              |                                               | Aldose 1-epimerase (EC 5.1.3.3)                                                                                |
|                                              |                                               | Galactose/methyl galactoside ABC transport system, D-galactose-binding periplasmic protein MglB (TC 3.A.1.2.3) |
|                                              |                                               | Beta-galactosidase (EC 3.2.1.23)                                                                               |
|                                              |                                               | Galactose/methyl galactoside ABC transport system, ATP-binding protein MglA (EC 3.6.3.17)                      |
| Lactose and Galactose Uptake and Utilization |                                               | Galactose-1-phosphate uridylyltransferase (EC 2.7.7.10)                                                        |
|                                              |                                               | Beta-galactosidase (EC 3.2.1.23)                                                                               |
|                                              |                                               | Evolved beta-D-galactosidase, alpha subunit                                                                    |
|                                              |                                               | Evolved beta-D-galactosidase transcriptional repressor                                                         |
|                                              |                                               | Galactoside O-acetyltransferase (EC 2.3.1.18)                                                                  |
|                                              |                                               | Formate--tetrahydrofolate ligase (EC 6.3.4.3)                                                                  |
|                                              |                                               | Formiminotetrahydrofolate cyclodeaminase (EC 4.3.1.4)                                                          |
|                                              |                                               | Methylenetetrahydrofolate dehydrogenase (NADP+) (EC 1.5.1.5)                                                   |
|                                              |                                               | 5,10-methylenetetrahydrofolate reductase (EC 1.5.1.20)                                                         |
|                                              |                                               | Methenyltetrahydrofolate cyclohydrolase (EC 3.5.4.9)                                                           |
| One-carbon Metabolism                        | One-carbon metabolism by tetrahydropterines   | 2-hydroxy-3-oxopropionate reductase (EC 1.1.1.60)                                                              |
|                                              |                                               | D-glycerate transporter (predicted)                                                                            |
|                                              |                                               | Pyruvate kinase (EC 2.7.1.40)                                                                                  |
|                                              |                                               | Glycerate kinase (EC 2.7.1.31)                                                                                 |
|                                              |                                               | L-lactate dehydrogenase (EC 1.1.2.3)                                                                           |
|                                              |                                               | Na(+)/Citrate OH(-) antiporter                                                                                 |
|                                              |                                               | Citrate lyase gamma chain, acyl carrier protein (EC 4.1.3.6)                                                   |
|                                              |                                               | [Citrate [pro-3S]-lyase] ligase (EC 6.2.1.22)                                                                  |
|                                              |                                               | Citrate lyase beta chain (EC 4.1.3.6)                                                                          |
|                                              |                                               | Citrate lyase alpha chain (EC 4.1.3.6)                                                                         |
| Organic acids                                | Citrate Metabolism, Transport, and Regulation | D-lactate dehydrogenase (EC 1.1.1.28)                                                                          |
|                                              |                                               | Alcohol dehydrogenase (EC 1.1.1.1)                                                                             |
|                                              |                                               | Acetaldehyde dehydrogenase (EC 1.2.1.10)                                                                       |
|                                              |                                               | Formate efflux transporter (TC 2.A.44 family)                                                                  |
|                                              |                                               | Pyruvate formate-lyase activating enzyme (EC 1.97.1.4)                                                         |
|                                              |                                               | L-lactate dehydrogenase (EC 1.1.1.27)                                                                          |
|                                              |                                               | Sugar/maltose fermentation stimulation protein homolog                                                         |
|                                              |                                               | Pyruvate formate-lyase (EC 2.3.1.54)                                                                           |
|                                              |                                               | Acetate kinase (EC 2.7.2.1)                                                                                    |
|                                              |                                               | Phosphate acetyltransferase (EC 2.3.1.8)                                                                       |
| Fermentation                                 | Fermentations: Mixed acid                     | Acetolactate synthase large subunit (EC 2.2.1.6)                                                               |

| Acetolactate synthase subunits |                                                          | Acetolactate synthase small subunit (EC 2.2.1.6)                                                      |                                                                                                  |
|--------------------------------|----------------------------------------------------------|-------------------------------------------------------------------------------------------------------|--------------------------------------------------------------------------------------------------|
| Fermentations: Lactate         |                                                          | D-lactate dehydrogenase (EC 1.1.1.28)                                                                 |                                                                                                  |
|                                |                                                          | L-lactate dehydrogenase (EC 1.1.1.27)                                                                 |                                                                                                  |
|                                |                                                          | Acetaldehyde dehydrogenase (EC 1.2.1.10)                                                              |                                                                                                  |
|                                |                                                          | Phosphate acetyltransferase (EC 2.3.1.8)                                                              |                                                                                                  |
|                                |                                                          | Acetate kinase (EC 2.7.2.1)                                                                           |                                                                                                  |
| Sugar alcohols                 | Glycerol and Glycerol-3-phosphate Uptake and Utilization | NADH peroxidase (EC 1.11.1.1)                                                                         |                                                                                                  |
|                                |                                                          | Glycerol-3-phosphate ABC transporter, permease protein UgpE (TC 3.A.1.1.3)                            |                                                                                                  |
|                                |                                                          | Glycerol-3-phosphate dehydrogenase (EC 1.1.5.3)                                                       |                                                                                                  |
|                                |                                                          | Glycerol-3-phosphate dehydrogenase [NAD(P)+] (EC 1.1.1.94)                                            |                                                                                                  |
|                                |                                                          | Glycerol-3-phosphate ABC transporter, permease protein UgpA (TC 3.A.1.1.3)                            |                                                                                                  |
|                                |                                                          | Glycerol kinase (EC 2.7.1.30)                                                                         |                                                                                                  |
|                                |                                                          | Glycerol-3-phosphate ABC transporter, periplasmic glycerol-3-phosphate-binding protein (TC 3.A.1.1.3) |                                                                                                  |
|                                |                                                          | Glycerophosphoryl diester phosphodiesterase (EC 3.1.4.46)                                             |                                                                                                  |
|                                |                                                          | Glycerol uptake facilitator protein                                                                   |                                                                                                  |
|                                |                                                          |                                                                                                       |                                                                                                  |
| Polysaccharides                | Glycogen metabolism                                      | 4-alpha-glucanotransferase (amylomaltase) (EC 2.4.1.25)                                               |                                                                                                  |
|                                |                                                          | 1,4-alpha-glucan (glycogen) branching enzyme, GH-13-type (EC 2.4.1.18)                                |                                                                                                  |
|                                |                                                          | Glycogen biosynthesis protein GlgD, glucose-1-phosphate adenylyltransferase family                    |                                                                                                  |
|                                |                                                          | Glycogen phosphorylase (EC 2.4.1.1)                                                                   |                                                                                                  |
|                                |                                                          | Glycogen debranching enzyme (EC 3.2.1.-)                                                              |                                                                                                  |
|                                |                                                          | Glycogen synthase, ADP-glucose transglucosylase (EC 2.4.1.21)                                         |                                                                                                  |
|                                |                                                          |                                                                                                       |                                                                                                  |
| Mannose Metabolism             |                                                          | Mannose-6-phosphate isomerase (EC 5.3.1.8)                                                            |                                                                                                  |
|                                |                                                          | Mannose-1-phosphate guanylyltransferase (GDP) (EC 2.7.7.22)                                           |                                                                                                  |
| D-ribose utilization           |                                                          | Ribose ABC transport system, ATP-binding protein RbsA (TC 3.A.1.2.1)                                  |                                                                                                  |
|                                |                                                          | Ribokinase (EC 2.7.1.15)                                                                              |                                                                                                  |
| Monosaccharides                | Deoxyribose and Deoxynucleoside Catabolism               | Ribose 5-phosphate isomerase B (EC 5.3.1.6)                                                           |                                                                                                  |
|                                |                                                          | Purine nucleoside phosphorylase (EC 2.4.2.1)                                                          |                                                                                                  |
|                                |                                                          | Ribokinase (EC 2.7.1.15)                                                                              |                                                                                                  |
|                                |                                                          | Phosphopentomutase (EC 5.4.2.7)                                                                       |                                                                                                  |
|                                | L-ascorbate utilization (and related gene clusters)      | Pyrimidine-nucleoside phosphorylase (EC 2.4.2.2)                                                      |                                                                                                  |
|                                |                                                          | Deoxyribose-phosphate aldolase (EC 4.1.2.4)                                                           |                                                                                                  |
|                                |                                                          | L-ribulose-5-phosphate 4-epimerase (EC 5.1.3.4)                                                       |                                                                                                  |
|                                |                                                          | 3-keto-L-gulonate 6-phosphate decarboxylase                                                           |                                                                                                  |
|                                | D-galactarate, D-glucarate and D-glycerate catabolism    |                                                                                                       | L-xylulose 5-phosphate 3-epimerase (EC 5.1.3.-)                                                  |
|                                |                                                          |                                                                                                       | Probable L-ascorbate-6-phosphate lactonase UlaG (EC 3.1.1.-) (L-ascorbate utilization protein G) |
|                                |                                                          | Ascorbate-specific PTS system, EIIC component                                                         |                                                                                                  |
|                                |                                                          | 2-hydroxy-3-oxopropionate reductase (EC 1.1.1.60)                                                     |                                                                                                  |
|                                |                                                          | D-glycerate transporter (predicted)                                                                   |                                                                                                  |
|                                |                                                          | Glycerate kinase (EC 2.7.1.31)                                                                        |                                                                                                  |
| Fructose utilization           |                                                          |                                                                                                       | Phosphoenolpyruvate-protein phosphotransferase of PTS system (EC 2.7.3.9)                        |
|                                |                                                          |                                                                                                       | PTS system, fructose-specific IIC component (EC 2.7.1.69)                                        |
|                                |                                                          |                                                                                                       | Transcriptional repressor of the fructose operon, DeoR family                                    |
|                                |                                                          |                                                                                                       | PTS system, fructose-specific IIB component (EC 2.7.1.69)                                        |
|                                |                                                          |                                                                                                       | Transaldolase (EC 2.2.1.2)                                                                       |
|                                |                                                          |                                                                                                       | PTS system, fructose-specific IIA component (EC 2.7.1.69)                                        |
|                                | Fructokinase (EC 2.7.1.4)                                |                                                                                                       |                                                                                                  |
|                                |                                                          | 2-hydroxy-3-oxopropionate reductase (EC 1.1.1.60)                                                     |                                                                                                  |

---

D-galactarate, D-glucose and D-glycerate catabolism - gjo

---

---

D-glycerate transporter (predicted)  
Glycerate kinase (EC 2.7.1.31)

---
